1 **The innate immunity protein C1QBP functions as a negative regulator of circulative**  
2 **transmission of *Potato leafroll virus* by aphids**

3

4 Stacy L. DeBlasio<sup>a,b,\*</sup>, Jennifer Wilson<sup>b,c\*,1</sup>, Cecilia Tamborindeguy<sup>c,2</sup>, Richard S.  
5 Johnson<sup>d</sup>, Patricia V. Pinheiro<sup>b,c,3</sup>, Michael J. MacCoss<sup>d</sup>, Stewart M. Gray<sup>a,c</sup> and Michelle  
6 Heck<sup>a,b,c,#</sup>

7

8 ***Author affiliation:***

9 <sup>a</sup> Emerging Pests and Pathogens Research Unit, USDA Agricultural Research Service,  
10 Ithaca, NY

11 <sup>b</sup> Boyce Thompson Institute for Plant Research, Ithaca, NY

12 <sup>c</sup> Section of Plant Pathology and Plant-Microbe Biology, Cornell University, Ithaca, NY

13 <sup>d</sup> Department of Genome Sciences, University of Washington, Seattle, WA

14

15 **Running title:** Aphid protein C1QBP negatively regulates PLRV

16

17 #Address correspondence to Michelle Heck, [michelle.cilia@usda.gov](mailto:michelle.cilia@usda.gov),

18 [mlc68@cornell.edu](mailto:mlc68@cornell.edu)

19

20 <sup>1</sup>Current address: USDA ARS U.S. Vegetable Laboratory, Charleston, SC

21 <sup>2</sup>Current address: Department of Entomology, Texas A&M University, College Station,  
22 TX

23 <sup>3</sup>Current address: Embrapa Rice and Beans, Santo Antônio de Goiás, Brazil

24

25 \*These authors contributed equally. Author order was determined on the basis of length  
26 of involvement with the project.

27

28 Word Count

29 Abstract – 250

30 Text – 10,823

31

32 **ABSTRACT**

33 The vast majority of plant viruses are transmitted by insect vectors with many crucial  
34 aspects of the transmission process being mediated by key protein-protein interactions.  
35 Yet, very few vector proteins interacting with virus have been identified and functionally  
36 characterized. *Potato leafroll virus* (PLRV) is transmitted most effectively by *Myzus*  
37 *persicae*, the green peach aphid, in a circulative, non-propagative manner. Using an  
38 affinity purification strategy coupled to high-resolution mass spectrometry (AP-MS), we  
39 identified 11 proteins from *M. persicae* displaying high probability of interaction with  
40 PLRV and an additional 23 vector proteins with medium confidence interaction scores.  
41 Two of these proteins were confirmed to directly interact with the structural proteins of  
42 PLRV and other luteovirid species via yeast two-hybrid with an additional vector protein  
43 displaying binding specificity. Immunolocalization of one of these direct PLRV-  
44 interacting proteins, an orthologue of the human innate immunity protein complement  
45 component 1 Q subcomponent-binding protein (C1QBP), shows that MpC1QBP partially  
46 co-localizes with PLRV within cytoplasmic puncta and along the periphery of aphid gut  
47 epithelial cells. Chemical inhibition of C1QBP in the aphid leads to increased PLRV  
48 acquisition and subsequently increased titer in inoculated plants, supporting the role of  
49 C1QBP as a negative regulator of PLRV accumulation in *M. persicae*. We hypothesize  
50 that the innate immune function of C1QBP is conserved in aphids and represents the first  
51 instance of aphids mounting an immune response to a non-propagative plant virus. This  
52 study presents the first use of AP-MS for the *in vivo* isolation of functionally relevant  
53 insect vector-virus protein complexes.

54

55 **IMPORTANCE**

56 The control of vector-borne disease is recognized as one of the major agricultural and  
57 human health challenges of today. Despite the importance of insect vectors, very little is  
58 known about the vector proteins that regulate transmission of viruses, especially viruses  
59 infecting plants. In this research, we adapt an emerging technique used to isolate host-  
60 pathogen interactions to identify insect vector-virus protein complexes. Using the aphid-  
61 borne, plant-infecting virus *Potato leafroll virus*, we identified several vector proteins  
62 interacting with this virus and go on to show that one of these proteins may be a part of  
63 the aphid immune system that limits the amount of virus in the insect. Identifying and  
64 understanding the role of this and other insect proteins may be the first step to developing  
65 new strategies to control these and other insect-borne viruses.

## 66 INTRODUCTION

67 Transmitting over 100 different plant virus species, aphids are the most prolific  
68 insect vectors in agroecosystems (1). Transmission of viruses by insect vectors, such as  
69 aphids, can be grouped into two general modes: circulative and non-circulative  
70 transmission, depending on the length and nature of the association of the virus with  
71 insect tissues. Circulative viruses traffic through insect vector tissues through a poorly  
72 described process of transcytosis, whereas non-circulative viruses largely adhere to insect  
73 mouthparts and some to the foregut (2). Moreover, plant viruses may or may not be  
74 propagative, or replicate, in their insect vector tissues. One important group of viruses  
75 vectored by aphids are the luteovirids (family *Luteoviridae*), which are transmitted in a  
76 circulative, non-propagative mode. The luteovirid *Potato leafroll virus* (PLRV, genus  
77 *Polerovirus*) and its primary vector, the green peach aphid, *Myzus persicae* (Hemiptera:  
78 Aphididae) are problematic in potato growing regions of the world, particularly where  
79 insecticides are not used to control aphid populations. PLRV is one of many viruses,  
80 which lead to degeneracy of potato and economically significant crop loss. Aphid  
81 populations rapidly become resistant to insecticides and thus, novel approaches to  
82 manage aphid-borne viral diseases are critically needed.

83 Circulative transmission of PLRV requires the successive passage of the virus  
84 through several membrane barriers of the aphid, most notably the gut and accessory  
85 salivary glands. Electron micrographs have detailed the transmission of luteovirids on the  
86 cellular level (3, 4). In the aphid gut, association of virus particles with receptors on the  
87 apical plasma membrane of epithelial cells initiates clathrin-mediated endocytosis (5).  
88 The virions traffic through the endomembrane system of gut epithelial cells in tubular

89 vesicles that eventually fuse with the basal cell membrane, a process known as  
90 transcytosis. Virions are then released into the hemocoel (6). This aspect of the  
91 transmission process is referred to as acquisition. Luteovirid species show different  
92 affinity for various regions of the gut; PLRV and other viruses in the genus *Polerovirus*  
93 are acquired through the posterior midgut (7) whereas those in the genus *Luteovirus* are  
94 preferentially acquired through for the hindgut. Once in the hemocoel, virions are  
95 hypothesized to diffuse until encountering the accessory salivary glands, where they  
96 adhere to the basal lamina and the process of transcytosis occurs again allowing virions to  
97 be released into the salivary duct and spit into the host plant along with salivary  
98 secretions during feeding (8). Each luteovirid species is only transmitted by one or a few  
99 aphid vector species (9).

100         However, across all plant virus-vector systems, fewer than a dozen vector proteins  
101 involved in transmission have been identified and functionally validated (10-16)  
102 (reviewed in (17)). It is not understood to what extent these protein interactions are  
103 conserved across different virus-vector systems. Virus receptor proteins expressed in the  
104 vector are an excellent example. The ephrin receptor protein was recently identified as a  
105 putative receptor for the luteovirids *Turnip yellows virus*, *Beet mild yellowing virus*, and  
106 *Cucurbit aphid borne yellows virus*, all in the genus *Polerovirus* and transmitted by the  
107 aphid *M. persicae* (18). However, a different protein, aminopeptidase-N, was shown to be  
108 a putative receptor of *Pea enation mosaic virus* in its primary vector, *Acrythosiphon*  
109 *pisum* (19). While there appears to be specificity in the cell-surface receptors for the  
110 luteovirids, it is possible that once virions enter cells the interactions may be more  
111 conserved. For instance, the protein cyclophilin B has been implicated in the transmission

112 of both the luteovirid *Cereal yellow dwarf virus-RPV* (CYDV-RPV, genus *Polerovirus*)  
113 by the aphid *Schizaphis graminum* (20) and the begomovirus *Tomato yellow leaf curl*  
114 *virus* (TYLCV, family *Geminiviridae*) transmitted by the whitefly *Bemisia tabaci* (11).

115 This is in contrast to the noncirculative viruses, where the same cuticle protein,  
116 *Myzus persicae* cuticle protein 4 (also known as stylin-01), is involved in adhesion of  
117 both *Cucumber mosaic virus* (CMV, *Bromoviridae: Cucumovirus*) (13) and *Cauliflower*  
118 *mosaic virus* (CaMV, *Caulimoviridae: Caulimovirus*) (15) to aphid stylets, even though  
119 CMV binds the stylet directly and CaMV uses the virus helper proteins P2 and P3 (21).  
120 However, noncirculative viruses show less vector specificity than luteovirids and other  
121 circulative viruses, as dozens of aphid vector species can transmit the same  
122 noncirculative virus (22) .

123 Identifying vector proteins involved in the transmission process remains  
124 technically challenging due in part to the small size of insect vectors, the lack of genomic  
125 resources for these vectors, the difficulty of extracting vector proteins (especially cuticle  
126 proteins important for non-circulative viruses) and the relatively low amount of virus  
127 present compared to relative levels in plants (especially for non-propagative viruses).  
128 Nevertheless, many *in vitro* approaches have been used to address this challenge  
129 including far-western virus overlays (12, 23-27) and yeast two-hybrid (13, 14, 28, 29).  
130 Others have looked for differentially expressed genes and proteins (30-34) or proteomic  
131 phenotyping of vector and non-vector insects within the same species (35-37). Once  
132 identified, functional analysis of these proteins is another hurdle as genome editing is not  
133 routine or trivial for aphids and other non-model organism insect vector species. The  
134 possible roles of these candidate proteins are myriad: some may be defense response

135 proteins from the vector, while other proteins crucial for the virus to move through the  
136 vector might be involved in other physiological functions. Moreover, plant viruses have  
137 been shown to manipulate their vectors on many levels, from counter-defense on the  
138 molecular level (16) to manipulating vector behavior and physiology (reviewed in (38)).  
139 Identifying these vector proteins and the role they play in transmission could be the key  
140 to developing strategies to block transmission. The activity of defense proteins can be  
141 enhanced, proteins the virus needs to complete its passage through the insect can be  
142 downregulated or edited to no longer bind to virus, and interfering with the virus' ability  
143 to manipulate vector behavior can slow or prevent vectors from finding infected plant  
144 hosts (discussed in (39)). Therefore, characterizing the role of vector proteins in the  
145 transmission process is of great importance to implement strategies to protect crops.

146 In this work, we used affinity purification coupled to high-resolution mass  
147 spectrometry (AP-MS) to identify PLRV-*M. persicae* protein complexes formed within  
148 aphid tissues. Previously, we applied this technique to capture and identify PLRV-plant  
149 protein complexes directly from virus-infected mesophyll and phloem tissue (40-42). We  
150 adapted this workflow to rapidly isolate PLRV-aphid protein complexes from viruliferous  
151 aphids. Using a variety of cellular and molecular approaches, we probed the functional  
152 role of complement component 1 Q subcomponent-binding protein (C1QBP), the most  
153 enriched virus-interacting aphid protein identified by AP-MS, in the transmission of  
154 PLRV by its insect vector. Collectively, our data provide evidence for the conserved role  
155 of this protein in animal immunity.

156

157 **RESULTS**



158 **Extraction of polerovirus-vector complexes requires different lysis buffer conditions**  
159 **from that used for plants.**

160 To determine an optimal buffer to use for capturing PLRV-associated protein  
161 complexes from aphids, we used a far-western approach to compare four routinely used  
162 extraction buffer compositions (40, 43) for their ability to extract PLRV-interacting aphid  
163 (Fig.1A, Table 1.). A denaturing buffer containing 2.5% SDS was used as a positive  
164 control as the strong detergent would extract the vast majority of proteins from the aphid.  
165 Whole, non-viruliferous, *M. persicae* were cryogenically lysed in a Mixer Mill using an  
166 increased number of grinding cycles than that used for plant tissue (40). The resulting  
167 powder was split equally and solubilized in the same volume of the different extraction  
168 buffers. Visual inspection of centrifugation-cleared homogenates showed differences in  
169 pigmentation, suggesting that, to some degree, each buffer resulted in the extraction of a  
170 different profile of molecules from the same pool of cryogenically lysed, tissue (Fig. 1A,  
171 top panel). The CHAPS-based buffer, optimal for extracting membrane bound proteins  
172 (43), resulted in a bluish-green hued homogenate, while extraction with the HEPES or  
173 TBT-based buffers supplemented with the non-ionic detergents Triton-X 100 and Tween-  
174 20, respectively, resulted in a yellowish-green tinted homogenate. Extraction with the  
175 Tris-based buffer (Fig. 1A, top panel, TRIS) was a combination of bluish-green and the  
176 reddish pigmentation observed when the same pool of tissue was extracted with SDS.

177 Similar to problems we encountered detecting virus in total protein extracts of  
178 systemically infected potato tissue (42), detection of PLRV in viruliferous aphid tissue  
179 extracts by western blot analysis using an antibody ( $\alpha$ -PLRV) specific for the PLRV  
180 structural proteins (40) was too faint and inconsistent to assess extraction efficiency (data

181 not shown). Therefore, we used far-western analysis to gauge the number of vector  
182 proteins able to bind with gradient purified PLRV virion in each buffer condition (Fig.  
183 1A, bottom panel). Protein extracts were separated (side-by-side) by one-dimensional  
184 SDS-PAGE and transferred to a nitrocellulose membrane and incubated with gradient  
185 purified PLRV. Aphid protein bands interacting with virus were subsequently detected  
186 with an  $\alpha$ -PLRV antibody (Fig. 1A, bottom panel, PLRV+ lanes). A parallel  
187 nitrocellulose blot of the same volume of aphid homogenate incubated with only primary  
188 and secondary antibodies served as a negative control (Fig. 1A, bottom panel, PLRV-  
189 lanes). Using this technique, we identified bands where PLRV bound to similar-sized  
190 vector proteins across several extraction conditions and also instances where PLRV  
191 bound proteins that differed in molecular weight depending on buffer composition (Fig.  
192 1A, bottom panel). The negative control blot incubated without virus shows that the  
193 majority of virus-interacting bands are not the result of cross-reactivity with antibody.  
194 Surprisingly, the HEPES-based buffer previously used for plants resulted in zero PLRV-  
195 interacting vector protein bands detected above negative control background levels (Fig.  
196 1A, bottom panel, HEPES). Very few PLRV-interacting vector protein bands were  
197 detected in the TBT extracted homogenate, most below 37 kilodaltons (kDa) in size. Both  
198 the CHAPS-based and Tris-based AP buffers resulted in the extraction of numerous  
199 vector protein bands interacting with PLRV virion and/or structural proteins. The Tris-  
200 based buffer had a similar protein banding profile as the SDS homogenate positive  
201 control and additional PLRV-interacting proteins detected above ~60 kDa that were not  
202 observed in the CHAPS buffer lane.

203           The Tris-based buffer was chosen for protein extraction in our final affinity  
204 purification workflow since it resulted in the greatest number of virus-interacting vector  
205 proteins across a wide range of molecular weights. Extraction using this buffer resulted in  
206 the faint detection of the PLRV structural proteins, the coat protein (CP, ~23 kDa) and  
207 full-length readthrough protein (RTP, ~80 kDa) by western blot, in the undiluted  
208 homogenate of viruliferous aphids compared to non-viruliferous aphids (Fig. 1B).  
209 Affinity purification conducted using  $\alpha$ -PLRV conjugated magnetic beads (42) resulted  
210 in significant enrichment of both the PLRV CP and a truncated form of the RTP (~50  
211 kDa) in the AP eluate from viruliferous aphids compared to the undiluted input fraction  
212 as shown by western analysis (Fig. 1B). Affinity purification of PLRV from aphids  
213 showed a lower level and less diversity of viral structural protein isoforms than affinity  
214 purification of PLRV from systemically infected potato homogenate extracted in the  
215 HEPES-based buffer (Fig. 1B, Pot). This is indicated by the increased intensity of  
216 protein bands corresponding to the PLRV CP and the detection of several different forms  
217 of the RTP, including the full-length monomeric form (~80 kDa), higher molecular  
218 weight RTP multimers (>80 kDa), and several RTP truncations (~50-80 kDa) in the  
219 potato affinity purification eluate.

220

## 221 **Assessment of batch effects across independent affinity purification mass** 222 **spectrometry experiments**

223           The AP-MS experiment was conducted in three independent trials. Each trial  
224 consisted of three biological replicate  $\alpha$ -PLRV affinity purifications from viruliferous  
225 (V) aphids and non-viruliferous (NV) aphids, which served as negative controls for non-

226 specific interaction of aphid proteins with beads and/or antibody. The first two  
227 experiments are designated by the month in which the AP batch was conducted (April or  
228 January). For the third trial, phosphatase inhibitor was added to the lysis buffer. This  
229 experiment is designated as phosphatase inhibitor (PhoIn). To determine the extent of  
230 batch effects across our independent experiments and identify deviations in data quality  
231 that may affect downstream interaction analyses, we compared the levels of three  
232 traditionally used AP-MS quality control metrics (44) to assess technical variability  
233 between AP samples (Fig. 2): 1. Abundance of IgG peptides in the samples, 2. MS1 peak  
234 area analysis of peptides derived from the bait, in this case CP and RTD, and 3. The total  
235 number of proteins identified per affinity purification.

236 To assess consistency in the amount of magnetic beads and/or efficiency of  
237 antibody conjugation used in each replicate, the relative protein abundance of  
238 immunoglobulin G (IgG) was quantified using MS1 peak area integration (Fig. 2A).  
239 Within a trial, percent coefficient of variation (CV) of IgG was fairly low (April = 9.4%  
240 CV; January = 13.1%; Phosphatase Inhibitor = 17.5%), indicating that, the level of  
241 beads/antibody were consistent across all viruliferous (V) and non-viruliferous (NV)  
242 biological replicates within an experiment. Levels of IgG in the phosphatase inhibitor  
243 dataset were ~ 2-fold lower as compared to the other datasets.

244 MS1 peak area integration of peptides specific to the CP and RTD domains of  
245 PLRV show that levels of PLRV enrichment in  $\alpha$ -PLRV APs from viruliferous aphids  
246 were significantly higher compared to negative control APs from non-viruliferous aphids,  
247 as expected (Fig. 2B). However, relative variability of PLRV enrichment was high across  
248 individual  $\alpha$ -PLRV APs from viruliferous aphids within a dataset with %CVs = 52.5

249 (April), 53.1 (January) and 28.9 (Phosphatase Inhibitor). Interestingly, despite exhibiting  
250 a 2-fold decrease in levels of IgG, levels of PLRV in viruliferous biological replicates in  
251 the PhoIn dataset had comparable levels of PLRV enrichment, indicating that the lower  
252 amounts of beads and/or antibody in these samples did not affect the efficiency of PLRV  
253 capture during affinity purification.

254 Finally, we looked at the average total number of proteins identified per  
255 biological replicate (Fig. 2C). Percent CV calculations show a high degree of relative  
256 variability across biological replicates within each dataset: 48.3% (April), 90.1%  
257 (January), and 120.1% (PhoIn). Differences in the number of proteins identified between  
258 the different datasets seem to correlate with the centrifugal speed at which the aphid  
259 homogenate was clarified after extraction. The April dataset, where aphid homogenates  
260 were cleared at the lowest centrifugation speed, had the highest number of protein  
261 identifications across replicates. The PhoIn dataset, in which biological replicates were  
262 cleared at the highest centrifugation speed, had the lowest number of protein  
263 identifications with the exception of the non-viruliferous, biological replicate 1 (Fig. 2C,  
264 Phosphatase Inhibitor, NV1). The January dataset had one biological replicate of  
265 viruliferous aphids (Fig. 3C, January, V1), which had the highest number of proteins  
266 identified, but also had a very low enrichment of PLRV (Fig. 2B, January, V1). In  
267 general, these results show that more proteins were identified when centrifugal speeds  
268 were slower and/or when bait capture was low, suggesting that variability in total protein  
269 identification may have been a result of increased non-specific binding to antibody and/or  
270 beads.

271

272 **Identification of viral and insect proteins *in complex* with PLRV isolated from**  
273 **viruliferous aphids by affinity purification.**

274 Due to the variability between datasets, we decided to perform label-free  
275 quantification of the peptides from each dataset separately to identify vector proteins that  
276 were significantly enriched with virus captured from viruliferous aphids compared to  
277 non-viruliferous controls. Initially, we identified a total of 106 vector proteins or protein  
278 clusters and one non-structural viral PLRV protein, the P1 polyprotein, whose average  
279 total spectral counts (SPC) were enriched  $\geq 2$ -fold or present/absent (+/-) in viruliferous  
280 APs in one or more of our three datasets compared to their respective non-viruliferous  
281 controls (Table S1). Taking into consideration the high variability observed in bait levels  
282 and total protein identification across AP samples, another filter criterion was that the  
283 enriched prey protein had to be detected in at least two of the three viruliferous AP  
284 biological replicates within a dataset. From this refined list of putatively enriched  
285 proteins, the average total SPC of 11 vector proteins and the PLRV P1 polyprotein were  
286 found to be significantly enriched in viruliferous APs by one or more statistical analyses:  
287 T-test, One-way ANOVA, and/or had a high-confidence probability score of  $\geq 0.8$  using  
288 the AP-MS statistical tool Significance Analysis of INTeractome (SAINT), a program  
289 that utilizes negative control AP data to identify non-specific interactions in a semi-  
290 supervised manner and computes confidence scores (probability) for putative interactions  
291 (45-47). We categorized these as high probability candidate interactions (Table 2). We  
292 identified a second category of 23 vector proteins (Table 3) with average total SPCs  $\geq 2$ -  
293 fold enriched or +/- in viruliferous APs in only one AP dataset but had medium  
294 confidence SAINT interaction scores (0.5 to 0.79).

295           Within the high probability interaction group, C1QBP was the only vector protein  
296 identified as significantly enriched in viruliferous APs in multiple datasets: 19.2-fold  
297 enrichment in the April dataset and present/absent (+/-) in the January dataset (Table 2  
298 and Table S1). Zero spectral counts were detected in viruliferous APs in the dataset  
299 where phosphatase inhibitor was added (Table S1), although some spectral counts were  
300 detected in the APs of non-viruliferous aphids within the same dataset. The remaining 10  
301 vector proteins as well as the PLRV P1 polyprotein were found significantly enriched in  
302 either the January or PhoIn dataset. Five of these proteins were annotated as cuticular  
303 proteins and had average total SPCs that were significantly enriched in the viruliferous  
304 APs where phosphatase inhibitor was added to the extraction buffer.

305           Since spectral-based counting is dependent upon machine selection of peptide  
306 signals for MS<sup>2</sup> fragmentation, it is often biased towards under-sampling low abundant  
307 peptides (48). Therefore, we used a second label-free quantification method, MS1 peak  
308 integration, to measure the full precursor ion signal intensities (MS<sup>1</sup>) for peptides  
309 corresponding to a subset of these putative PLRV-interacting proteins to validate their  
310 enrichment trends in viruliferous APs compared to their respective non-viruliferous  
311 controls (Fig. 3, Table S2). Significant enrichment of C1QBP was confirmed in the APs  
312 from viruliferous aphids in the April and January datasets (Fig. 3A). Levels of C1QBP  
313 were low and equal in AP samples where phosphatase inhibitor was added. Two vector  
314 proteins, paramyosin and a proteoglycan 4-like protein, both predicted to be high  
315 probability candidate interactions in the January or PhoIn spectral counting datasets,  
316 respectively (Table 2), did exhibit an average trend of MS1-based enrichment (1.4 to 3.8-  
317 fold) in viruliferous APs compared to their respective non-viruliferous controls in all

318 three datasets (Fig. 3B-C). Average co-enrichment for paramyosin was statistically  
319 significant ( $P < 0.05$ , Student's  $t$ -test) when biological replicates from all three datasets  
320 were averaged together (Fig. 3B, All) and  $P = 0.059$  for the January dataset (Fig. 3B,  
321 January, Student  $t$ -test). Similarly, when all biological replicates were analyzed together,  
322 the significance of enrichment for the proteoglycan-like protein was  $P = 0.058$  (Fig. 3C,  
323 All, Student  $t$ -test). Comparable to what was observed by spectral-counting, *M. persicae*  
324 cuticle protein 21 was significantly enriched ( $P < 0.05$ , Student  $t$ -test) only in the dataset  
325 where phosphatase inhibitor was added (Fig. 3D, PhoIn). However, an RR1-like cuticle  
326 protein from our medium-confidence interaction group, even though it exhibited a trend  
327 of enrichment in viruliferous APs in all three datasets, as the differences were not  
328 significant (Fig. 3E). Lastly, significant enrichment of the PLRV P1 polyprotein was  
329 confirmed by MS1 peak integration in viruliferous APs in both the April and January  
330 dataset (Fig. 3F), even though spectra-based counting indicated no sampling of P1 in the  
331 April APs (Table 2). This was most likely due to interference of a co-eluting peptide  
332 within the same retention time window (data not shown) as indicated by background  
333 signal detected in non-viruliferous AP controls even though aphids were fed on plants  
334 that did not contain virus (Fig. 3F, NV).

335

### 336 **Validation of direct interaction between luteovirid structural proteins and vector** 337 **proteins identified by AP-MS using yeast-two-hybrid.**

338 In a parallel experiment, a yeast-two-hybrid screen of a cDNA library constructed  
339 from whole-body mRNA extracts of the green bug aphid *S. graminum*, a competent  
340 vector of the yellow dwarf viruses, confirmed direct interaction of luteovirid structural



341 proteins with orthologues of three *M. persicae* proteins identified in our AP-MS  
342 experiment. *S. graminum* proteins translated from vector expressed sequence tags (ESTs)  
343 fused to the activating domain (AD) of the yeast transcription factor GAL4, were  
344 screened for interaction with GAL4 DNA binding domain (BD) protein fusions of the CP  
345 or readthrough domain (RTD) from the luteovirids *Barley yellow dwarf virus-PAV*  
346 (BYDV-PAV, genus *Luteovirus*), *Cereal yellow dwarf virus-RPV* (CYDV-RPV, genus  
347 *Polerovirus*), and PLRV, which *S. graminum* does not transmit. From this initial screen  
348 and subsequent co-transformation experiments, a partial sequence of SgC1QBP (~98%  
349 identity to C1QBP from *R. madis*, XP\_026823488.1) was found to directly interact with  
350 the CP of BYDV-PAV, CYDV-RPV, and PLRV as indicated by blue coloring and  
351 growth on quadruple dropout media supplemented with X- $\alpha$ -gal. Negative controls  
352 showed that AD-SgC1QBP did not interact with BD protein fusions of murine p53 and  
353 lamin C (Fig. 4A).

354 Two other *S. graminum* proteins were also identified from this Y2H screen that  
355 overlapped in function with vector proteins identified as enriched in our AP-MS  
356 experiment with PLRV: a RR1-type cuticle protein and papilin isoform X1 (Table 3). A  
357 280 nucleotide (nt) EST coding for a cuticle protein belonging to the RR1 group and a  
358 560 nt EST sequence showing similarity to an ectodermal papilin-like protein  
359 (XP\_015371026.1), on the amino acid level were identified during the screening of the  
360 full body *S. graminum* cDNA library with the CP of CYDV-RPV. The *S. graminum* RR1  
361 cuticular protein was found to directly interact with the CP of CYDV-RPV and BYDV-  
362 PAV indicated by the blue-coloring of co-transformants grown on double dropout media,  
363 but not the CP of PLRV, nor the RTD sequences of any of the viruses (Fig. 4B). The *S.*

364 *graminum* papilin-like protein was found to weakly interact (Fig. 4C, fainter blue  
365 coloring) with both virus structural protein domains, CP and RTD, from BYDV-PAV,  
366 CYDV-RPV, and PLRV. Again, no interaction was detected with the negative control  
367 p53 and lamin C proteins with either of these vector proteins, indicating the interactions  
368 to be specific. Interestingly, homologs of both these proteins were assigned medium-  
369 confidence interaction SAINT scores (0.66 and 0.67, respectively) in only one dataset of  
370 our *M. persicae* AP-MS experiments (Table 3). Furthermore, label-free quantification of  
371 relative protein abundance by MS1 peak integration showed that, although the RR1  
372 cuticle protein homolog had a trend of enrichment in all AP-MS datasets, high variability  
373 in protein levels across APs most likely reduced our ability to detect statistical  
374 significance, a scenario that often occurs when protein interactions are low abundant,  
375 weak and/or transient (49). Collectively, our data highlight the need for complementary  
376 experimental approaches to validate these types of protein-protein interactions that may  
377 fall short of accepted significance thresholds in challenging AP-MS experiments where  
378 bait levels are low and variability (technical and/or biological) is high.

379

380 **Measuring changes in the relative abundance of PLRV-interacting aphid proteins**  
381 **after feeding on an infected host plant.**

382 We used a shotgun proteomics approach to assess whether the abundance of aphid  
383 proteins predicted to complex with PLRV by AP-MS (Tables 2 and 3) changed their  
384 abundance during virus acquisition. Within this shotgun dataset, peptides from six of our  
385 candidate PLRV-interacting *M. persicae* proteins were detected: C1QBP, paramyosin,

386 collagen alpha-5 chain, cuticle protein 21, RR1 cuticle protein and basement membrane-  
387 specific heparan sulfate proteoglycan core protein (HSPG2).

388 Quantification by spectral-based counting showed that the average relative  
389 abundance of five of these proteins, including our highest confidence PLRV-interacting  
390 protein, C1QBP, were unchanged between viruliferous and non-viruliferous aphids (Fig.  
391 5), indicating that their increase in abundance in  $\alpha$ -PLRV APs from viruliferous aphids  
392 was not a consequence of higher expression of a protein non-specifically interacting with  
393 the antibody-coated magnetic beads. Conversely, one of the vector proteins predicted to  
394 form a high-confidence interaction with PLRV, collagen alpha-5 chain, which exhibited  
395 3.8-fold enrichment (average total SPC) in viruliferous APs where phosphatase inhibitor  
396 was added (Table 2), also shows a 2-fold increase in expression in viruliferous insects  
397 (Fig 5C). With our current data, it is unclear whether the enrichment of collagen alpha-5  
398 chain that was detected in viruliferous APs is solely due to a greater abundance of this  
399 protein in viruliferous insects or if it is a true interaction. Regardless, these results show  
400 that acquisition of PLRV by *M. persicae* leads to the differential expression of this  
401 protein.

402 Collectively, the proteomics and yeast-two hybrid experiments are hypothesis-  
403 generating tools. The most statistically enriched vector protein in our AP-MS  
404 experiments is MpC1QBP, which also directly binds to the CP of luteovirids. We decided  
405 to test the hypothesis that MpC1QBP was involved in PLRV transmission by *M. persicae*  
406 by performing additional experiments to characterize this protein and test whether it  
407 regulates virus transmission.

408

409 **C1QBP from *M. persicae* shares sequence similarity and conserved truncation sites**  
410 **with C1QBP from humans and other insects.**

411 C1QBP is highly conserved among aphid species with most sharing >90% amino  
412 acid sequence identity with the C1QBP sequence from *M. persicae*, but the protein is less  
413 conserved among other distantly related hemipterans such as the Asian citrus psyllid and  
414 planthopper species (Fig. 6). Human C1QBP (28% identity /43% similarity to  
415 MpC1QBP) is a mitochondrial matrix protein (p32) involved in a broad array of  
416 pathways including immunity and cancer progression and has been shown to localize to  
417 multiple cellular compartments (52-55). The yeast orthologue, MAM33, is a molecular  
418 chaperone that functions in the assembly of mitoribosomal proteins, which regulate the  
419 translation of key proteins involved in oxidative phosphorylation (56).

420 Global alignment with MpC1QBP of representative orthologous sequences across  
421 kingdoms shows high conservation of residues in the C-terminus of the protein (amino  
422 acids 187- 243) but less so in the N-terminal region of these proteins (Fig. 7A). In  
423 humans, the first 73 amino acids of the C1QBP N-terminus codes for a mitochondrial  
424 targeting peptide that is cleaved after import into the mitochondrial matrix (57). The two  
425 residues immediately following the known truncation position in human C1QBP (Fig.  
426 7A, red arrowhead) are highly conserved between human and insect sequences (*D.*  
427 *melanogaster*, *A. pisum*, and *M. persicae*), with all four species having a histidine residue  
428 immediately downstream of the truncation site followed by a serine in aphids or the  
429 biochemically similar residue, threonine, in *D. melanogaster* and humans. These residues  
430 are not conserved at this position in C1QBP orthologues from yeast and plants. We did  
431 not identify peptides corresponding to the MpC1QBP N-terminus upstream of this

432 predicted truncation site in any of our APs from viruliferous aphids (Fig. 7B), even  
433 though tryptic peptides are predicted to be produced from this region. The first tryptic  
434 peptide identified in our data, K.ELQQFLDNEIKSEEQTSDK.S, is located six residues  
435 downstream of the predicted truncation site (Fig. 6B, red box). Furthermore, the *S.*  
436 *graminum* Y2H screen also only identified an EST that produced a truncated form of  
437 C1QBP (Fig. 6, blue arrowhead). These data suggest that PLRV most likely interacts  
438 exclusively with the truncated form of C1QBP *in vivo*.

439

440 **C1QBP and PLRV localize to distinct but overlapping subcellular compartments in**  
441 ***M. persicae* midgut cells.**

442 Whole-mount immunostaining of guts dissected from viruliferous aphids with an  
443 antibody raised against the full-length version of human C1QBP ( $\alpha$ -HsC1QBP) and  $\alpha$ -  
444 PLRV showed MpC1QBP signal could be detected by laser scanning confocal  
445 microscopy throughout the alimentary canal (anterior midgut, posterior midgut, and  
446 hindgut) and overlapped with  $\alpha$ -PLRV signal in the midgut (Fig. 8A). The subcellular  
447 localization pattern of  $\alpha$ -HsC1QBP signal was mainly observed as diffuse puncta within  
448 the cytoplasm of midgut cells, which partially co-localized with  $\alpha$ -PLRV signal in some  
449 areas (Fig. 9B-C, white arrows). In areas where puncta do not co-localize, fluorescence  
450 from  $\alpha$ -HsC1QBP and  $\alpha$ -PLRV were often adjacent to one another suggesting that  
451 subcellular compartments containing C1QBP may be coming into contact with those that  
452 contain PLRV (Fig. 8C). Intriguingly,  $\alpha$ -HsC1QBP labeled puncta could also be  
453 observed aligned along the cell periphery, again partially co-localizing or adjacent to  $\alpha$ -  
454 PLRV labeled puncta (Fig. 8D-E, white arrowheads). Fluorescence was not observed in

455 viruliferous guts stained with secondary antibodies only (Fig. 8F). Nor was fluorescence  
456 signal from  $\alpha$ -PLRV detected in non-viruliferous guts imaged with the same parameters  
457 (Fig. 8G) indicating that  $\alpha$ -PLRV signal was specific. Furthermore, the localization  
458 pattern of  $\alpha$ -HsC1QBP in non-viruliferous guts was similar to that found in viruliferous  
459 aphid cells (Fig. 8G). Our data support the hypothesis that C1QBP and PLRV are in  
460 proximity to directly interact in aphid gut epithelial cells, potentially along the cell  
461 periphery, plasma membrane and in the cytoplasm.

462

#### 463 **Localization of MpC1QBP to motile cellular compartments is conserved.**

464 In addition to mitochondria, human C1QBP has also been shown to localize to  
465 several other subcellular compartments including endosomes and the plasma membrane  
466 (58-62), two compartments within cells that PLRV uses to transverse the aphid gut. Such  
467 detailed cellular studies are limited in aphids where ectopic expression of markers is  
468 currently not possible. Therefore, to assess conservation of subcellular localization that  
469 could be correlated with the localization patterns observed in aphid guts, we ectopically  
470 co-expressed an MpC1QBP-YFP fusion protein in the model plant *Nicotiana*  
471 *benthamiana* with or without several previously described fluorescently tagged organelle  
472 markers: COX4-mCherry (mitochondria), MAN49-mCherry (Golgi), and mCherry-  
473 RAB7 (endosomes) (63). Ectopic expression in plants can provide insight into the  
474 subcellular localization of MpC1QBP as many eukaryotic localization signals are  
475 conserved (64). Moreover, plants are an attractive heterologous system for the study of  
476 plant virus-interacting proteins, as plant virus structural proteins are expressed and  
477 assembled in the plant host before encountering vector tissues.

478           In live plant epidermal cells, MpC1QBP-YFP signal was observed as punctate,  
479 motile bodies throughout the plant cytoplasm (Fig. 9A). Co-expression of MpC1QBP  
480 with the markers reveals this localization to also be multicompartmental (Fig. 9B-D),  
481 with patterns similar to what has been shown for C1QBP in human cells. Fluorescence  
482 from MpC1QBP-YFP co-localized with the mitochondrial matrix marker COX4-  
483 mCherry but was also observed independently in globular structures that came into  
484 contact with mitochondria (Fig. 9B). Further analysis indicated that MpC1QBP-YFP  
485 localized in a partially overlapping pattern with the Golgi-marker MAN49- (Fig. 9C) and  
486 the late-endosomal marker mCherry-RAB7 (Fig. 9D). Together, these data show that  
487 sequence signals for localization and possibly truncation of MpC1QBP are conserved  
488 between aphids and human C1QBP and that intracellular C1QBP docking sites are  
489 conserved in plants. We did not observe association of MpC1QBP-YFP with the plant  
490 plasma membrane, a pattern that was observed in our immunolocalization experiment in  
491 aphid guts (Fig. 8D-E).

492

#### 493 **C1QBP functions as a negative regulator of PLRV transmission.**

494           To assess the function of C1QBP in PLRV transmission, we used a commercially  
495 available, small molecule inhibitor of HsC1QBP, M36. The inhibitor, identified in a  
496 pharmacophore screen by V. Yenugonda et al. (65), binds to HsC1QBP and inhibits its  
497 mitochondrial function in human glioma cells. *M. persicae* were exposed to a range of  
498 M36 concentrations (0, 50, 100 and 200  $\mu$ M) supplied through sucrose diet sachets. After  
499 48 hours of feeding on the inhibitor, aphids were moved to detached PLRV-infected or  
500 uninfected HNS leaves for a 24-hour acquisition access period (AAP) followed by a 72-

501 hour inoculation access period (IAP) on 3-week-old potato (cv. Red Maria) seedlings. No  
502 differences in mortality were observed in the aphids as a result of the inhibitor treatments.  
503 The titer of PLRV in these recipient plants was then measured four weeks post  
504 inoculation (wpi) by double antibody sandwich enzyme-linked immunosorbent assay  
505 (DAS-ELISA). Results show that the percent of inoculated plants becoming systemically  
506 infected with virus was not statistically different when using aphids exposed to M36  
507 compared to aphids that were not exposed to inhibitor (Fig. 10A, Table S3). However,  
508 plants that became systemically infected had higher titers of virus when aphids were  
509 exposed to concentrations of M36  $\geq 100 \mu\text{M}$  (Fig. 10B). When aphids were fed on diets  
510 containing  $50 \mu\text{M}$  of M36, PLRV titer was variable and statistically similar to plants  
511 inoculated with aphids not exposed to M36. Conversely, plants inoculated with aphids  
512 fed on  $200 \mu\text{M}$  of inhibitor exhibited a 1.63 fold-increase in virus titer that was  
513 statistically significant compared to the 0 and  $50 \mu\text{M}$  M36 treatment conditions ( $P <$   
514  $0.05$ ). Exposure to  $100 \mu\text{M}$  of inhibitor resulted in an intermediate phenotype, with a non-  
515 significant increase of titer relative to the control, but still less virus than in the  $200 \mu\text{M}$   
516 treatment (Fig. 10B). No obvious effects on mortality or visual effects on feeding  
517 behavior were observed at any of the concentrations of inhibitor.

518 To test whether the observed increase in inoculated plant titer correlated with an  
519 increase in PLRV acquisition by the insects, aphids were exposed to 0 or  $200 \mu\text{M}$  of  
520 inhibitor in sucrose diet for 48 hours and then moved to a PLRV-infected HNS leaf for  
521 24-hour AAP (as in the transmission assay). After the AAP, the guts of aphids were  
522 cleared on fresh sucrose diet for 3 days to ensure detection of fully acquired and not  
523 ingested PLRV. The level of PLRV vRNA in individual aphids ( $n=12-15$ ) was then



524 measured by RT-digital drop PCR (ddPCR). A high percentage of aphids in both the  
525 control and inhibited treatments acquired virus (90% vs. 86%, data not shown), but on  
526 average, aphids exposed to 200  $\mu$ M inhibitor acquired a significantly higher number of  
527 copies of PLRV ( $P = 0.015$ , 1.71-fold increase) compared to aphids fed on diet without  
528 M36. Together, these data suggest that C1QBP acts as a negative regulator of PLRV in  
529 the aphids, as inhibition of this protein by M36 leads to an increase in PLRV titer in the  
530 insects, and subsequently the aphid-inoculated plants.

531

## 532 **DISCUSSION**

533 Optimization of several different extraction buffer conditions shows that no single  
534 extraction buffer tested captures all protein interactions formed between aphid proteins  
535 and PLRV. We encountered high variability between the three different trials of the  
536 experiment, even though there was significant capture of PLRV from viruliferous aphids  
537 in all biological replicates. This variability may be due to technical considerations, such  
538 as sub-optimal clarification of aphid homogenate increasing the capture of non-specific  
539 interactions, or biological reasons, such as the potentially transient nature of the  
540 interaction between some vector proteins and virus. Alternatively, variability in AP-MS  
541 experiments could be the result from true binding partners also having some high level of  
542 non-specific “stickiness” towards beads and/or antibody, thus making it hard to detect  
543 true signal above background (66). Other groups attempting to capture virus-vector  
544 protein complexes by AP have resorted to chemical cross-linking to preserve more  
545 transient interactions (19).

546 Transient interactions may be better captured by yeast two-hybrid where

547 reconstitution of GAL4 stabilizes the interaction. This may explain why the vector  
548 proteins RR1 cuticle protein 5 and papilin isoform X1 were found to interact with  
549 luteovirids via Y2H and were enriched in our AP-MS experiments but considered lower  
550 confidence interactors. Interestingly, in the Y2H experiments, the RR1 cuticle protein  
551 from *S. graminum* directly interacted with the CP from luteovirid species transmitted by  
552 that aphid species but did not show interaction with PLRV CP, a virus *S. graminum* does  
553 not transmit, suggesting aphid-virus specificity or that the interaction is weaker/more  
554 transient between PLRV and *M. persicae*. This specificity phenotype is in-line with a  
555 previous study showing that vector competency of *S. graminum* was linked to specific  
556 protein isoforms that only differed by one amino acid from isoforms in non-competent  
557 lines of an F2 population (35). Taken together, these data suggest that even low  
558 confidence binding partners identified by AP-MS may be true direct binding partners of  
559 virus, and this technique can be complemented and the interactions confirmed by Y2H or  
560 other direct interaction methods. Moreover, this technique also identified at least one  
561 functionally relevant aphid protein interaction, MpC1QBP.

562         Addition of phosphatase inhibitor to the lysis buffer for the third AP-MS  
563 experiment allowed us to observe which interactions may be dependent on  
564 phosphorylation status. For instance, levels of cuticle protein 21 were significantly  
565 enriched by MS1 peak integration in APs from viruliferous aphids only when  
566 phosphatase inhibitor was added to the extraction buffer. However, RR1 cuticle protein-  
567 5, which directly interacted with the luteovirid CP in a virus-specific manner via Y2H,  
568 exhibited a trend of PLRV co-enrichment with or without phosphatase inhibitor,  
569 suggesting that this characteristic may only apply to certain classes of aphid cuticle

570 proteins. Conversely, MpC1QBP and the viral non-structural polyprotein P1 were both  
571 significantly co-enriched with PLRV in all APs from viruliferous aphids except those  
572 where phosphatase inhibitor was added. These results suggest that interaction with PLRV  
573 may be contingent on phosphorylation of the vector proteins, protein complex partners, or  
574 the virion itself. Phosphorylation and acetylation of luteovirid capsid proteins have been  
575 previously shown (40, 67) although biological relevance of these post-translational  
576 modifications still remains to be determined.

577         Since PLRV is non-propagative in the aphid, the discovery of the P1 viral  
578 replication protein in PLRV protein complexes isolated from aphids was a surprising  
579 find. The aphids collected for AP were not subjected to gut-clearing prior to AP, thus our  
580 results could simply indicate capture of virion-P1 complexes from ingested sap in the  
581 aphid lumen. However, the ingestion of these complexes by the aphid raises the  
582 possibility that P1 may be internalized into aphids during virus acquisition. Indeed, P1  
583 was found directly bound to purified TuYV virions using chemical cross-linking mass  
584 spectrometry (68). Furthermore, the PLRV P1 protein suppresses aphid-induced jasmonic  
585 acid signaling in *N. benthamiana* indicating a role for P1 in vector manipulation (69).  
586 One hypothesis our data generates is that P1 protein-PLRV virion complexes that are  
587 acquired from infected plants. These P1-virion complexes may circulate through the  
588 aphid and be inoculated into new host plants together, which may help nascent PLRV  
589 infections to become established in new host plants. Immunolocalization of the P1  
590 polyprotein within aphid cells would support this hypothesis.

591         While cuticle proteins have recently been identified as putative receptors for  
592 nonpersistent viruses that bind cuticle-lined aphid mouthparts (13, 15), the exact role of

593 cuticle proteins in the transmission of circulative viruses remains elusive. Cuticular  
594 proteins are frequently identified in vector-plant virus interaction assays (23, 26). For  
595 example, out of six western flower thrips proteins found to interact with TSWV in a study  
596 by I. E. Badillo-Vargas et al. (23), half were annotated as cuticle proteins. Genes coding  
597 for cuticle proteins were also the largest group found to be responsive to the tospovirus  
598 *Tomato spotted wilt virus* (TSWV), with the majority of these genes being downregulated  
599 in the larval and prepupal stages of the insect when TSWV is acquired (30). An aphid  
600 cuticle protein was also identified as binding *Beet western yellows virus* (BWYV, Genus:  
601 *Polerovirus*) *in vitro*, another luteovirid that is transmitted by *M. persicae* (26). Authors  
602 hypothesized that the interaction between luteovirids and cuticle proteins could represent  
603 an ancient, less efficient mode of virus transmission in aphids. In addition to comprising  
604 the exoskeleton of the insect, cuticle proteins are present in the foregut and hindgut in  
605 many hemipterans, locations within the alimentary canal where luteovirids are either  
606 acquired or possibly excluded from moving into gut cells. Determining where viral  
607 interaction with cuticular proteins occurs can be the key to understanding their function.  
608 For instance, the cuticle protein CPR1 from the insect vector *Laodelphax striatellus* was  
609 found to interact with the tenuivirus *Rice stripe virus* and co-localize with virion in insect  
610 hemocytes (14). Knockdown of CPR1 led to decreased virus accumulation in the  
611 hemolymph and salivary glands, while transmission to plants was reduced. The authors  
612 concluded that CPR1 might bind and stabilize RSV in the hemolymph to protect it from  
613 degradation or facilitate passage to the salivary glands. Further tissue-specific interaction  
614 or localization studies with the PLRV-interacting cuticle proteins identified in our study  
615 as well as functional assays could shed light on the role these proteins play in the

616 transmission or PLRV, or poleroviruses in general.

617           Complement component 1 Q subcomponent-binding protein (C1QBP) was found  
618 to be the most enriched vector protein in  $\alpha$ -PLRV APs from viruliferous aphids  
619 compared to non-viruliferous controls in the absence of phosphatase inhibitor. A protein  
620 orthologue in *S. graminum* directly interacted in Y2H assays with the CP domain of  
621 multiple virus species from the family *Luteoviridae*, including PLRV, indicating a more  
622 conserved role for C1QBP in circulative transmission. The C1QBP protein is  
623 evolutionary conserved; with sequences being found in other distantly related eukaryotic  
624 species (70). Phylogenetic analysis indicates that C1QBP from aphids is more closely  
625 related to human C1QBP that has evolved multiple functions and is less related to  
626 C1QBP in plants and yeast, which so far has only been shown to function in oxidative  
627 phosphorylation (56).

628           The putative function of human C1QBP has been extensively studied due to the  
629 finding that its expression is highly elevated in cancer cells (54), and biallelic mutations of  
630 *C1QBP* in the human population are associated with a mitochondrial disorder that leads  
631 to cardiomyopathy (71). Structurally, C1QBP forms a donut-shaped homotrimer (72). Its  
632 conserved eukaryotic function is as a molecular chaperone involved in ribosomal  
633 biogenesis in mitochondria (56, 71). However, in humans, the protein is multifunctional,  
634 having roles in innate and adaptive immunity, inflammation, infection, apoptosis, pre-  
635 mRNA splicing, macrophage cell adhesion and cancer cell metastasis (73-78). C1QBP  
636 was first identified as a binding partner of C1q (79), a component of the complement  
637 pathway in human blood which binds antibody-antigen complexes and activates the  
638 complement system (80). However, HsC1QBP also binds directly to capsid proteins of

639 numerous viruses, including rubella (81), human immunodeficiency virus type 1 (82),  
640 and herpes simplex virus 1 (83). Collectively, our interaction experiments indicate the  
641 ability of C1QBP to bind viruses may also be evolutionarily conserved in insects.

642         During circulative transmission, luteovirid virions are acquired into aphid gut  
643 cells via receptor-mediated endocytosis and trafficked across the cell in clathrin-coated  
644 vesicles that can be tubular in structure (5). A. Garret et al. (6) shows that virions are  
645 sometimes observed in lysosomes or multivesicular bodies (MVBs), but the exact role  
646 these organelles have in transmission still remains uncharacterized. It is also unknown  
647 whether virus-containing vesicles contact the mitochondria, the primary location of  
648 C1QBP in human cells. Therefore, based on what has been published about luteovirid  
649 trafficking, it is difficult to say in which subcellular compartment MpC1QBP and PLRV  
650 are interacting in the aphid gut epithelial cell cytoplasm, and whether this localization is  
651 necessary for the normal transcytosis of virions. Considering that live-cell imaging  
652 studies of eukaryotic cells have shown that most organelles are not static, discrete  
653 compartments but rather dynamic entities that actively associate with one another (84),  
654 the hypothesis that virus-containing vesicles do come in contact with other organelles as  
655 they traverse the aphid cell, is plausible. The development of robust subcellular markers  
656 in aphids is definitely needed to determine conclusively what subcellular compartments  
657 MpC1QBP and PLRV occupy.

658         As for the function of MpC1QBP in luteovirid transmission, we can turn to the  
659 known roles of C1QBP in human innate immunity for clues. Virus binding to vector  
660 proteins may be an effort by the virus to hijack vector machinery to facilitate its  
661 transmission or an effort by the insect to defend against the virus. On the surface of cells,

662 HsC1QBP can act as a receptor for viral entry into cells (85-87). Infection of human cells  
663 with Sendai virus leads to a re-localization of C1QBP to the mitochondria, where it  
664 dampens the RIG-I and MDA5-dependent (MAVS) antiviral defense response by binding  
665 key signal transduction molecules, which results in the promotion of viral replication  
666 (88). In the case of HsC1QBP binding to rubella virus, it was found that inhibition of  
667 C1QBP slows microtubule-directed redistribution of mitochondria and reduces rubella  
668 virus replication (89). This led the authors to hypothesize that rubella capsid protein  
669 binding to C1QBP helps traffic mitochondria near sites of rubella virus replication to help  
670 supply energy. Thus, in human cells, some viruses have evolved to commandeer the  
671 function of C1QBP to support propagation. In the case of MpC1QBP interaction with  
672 PLRV, exposure to the C1QBP chemical inhibitor M36 had the opposite effect and lead  
673 to an increase of PLRV titer in aphids. For a non-propagative virus, ways this may be  
674 achieved include an increase in the rate of virus acquisition or an enhanced stability of  
675 the acquired virus in aphid tissues. Our data supports the role of MpC1QBP as a negative  
676 regulator of PLRV accumulation in the aphid. Restricting the amount of virus in the  
677 insect would be consistent with the role of a defense protein. Therefore, it is possible that  
678 the innate immune function of C1QBP is conserved in aphids.

679         However, because PLRV is non-propagative in its aphid vector, we would not  
680 expect the insects to launch an immune response to the virus. Nevertheless, this does not  
681 preclude aphids from recognizing luteovirids as a pathogen based on their icosahedral  
682 geometry typical of viruses. Therefore, we hypothesize that MpC1QBP recognizes the  
683 pathogen-associated molecular pattern (PAMP) of the luteovirid capsid and activates or  
684 participates in some immune response that leads to the reduced transmission of PLRV. If

685 MpC1QBP does act as a sentinel for viral invaders, then this is in line with our shotgun  
686 proteomics data that shows MpC1QBP is expressed in non-viruliferous aphids, and its  
687 level is unchanged in response to PLRV. It is unknown what innate immune pathway  
688 MpC1QBP would be a part of, as insects do not have the classical complement pathway  
689 of higher organisms, although proteins with C1q-like domains have been detected in  
690 insects, including the pea aphid (90). Aphids also lack the immunodeficiency (IMD)  
691 pathway common in other insects, though homologues for the constituents of other  
692 conserved innate immune pathways, such as JAK-STAT and Toll, have been found in  
693 aphid genomes (91). It should be noted that, even though our imaging was limited to the  
694 gut, our interaction and functional studies were conducted using whole aphids. Therefore,  
695 the inhibitory function of MpC1QBP in other parts of the aphid involved in circulative  
696 transmission, such as the hemolymph (insect blood) and the accessory salivary glands,  
697 cannot be distinguished.

698 Comparing the acquisition data to the transmission data for inhibition of  
699 MpC1QBP, it is interesting that an increase in the amount of virus acquired by the insects  
700 did not necessarily correlate with an increase in percent transmission. In our experiments,  
701 the consequence of inhibited aphids acquiring more virus does not seem to be more  
702 transmission, but rather higher virus titer in the plants that do become infected. A  
703 possible explanation is that, in the conditions used for our experiment, a high percentage  
704 of aphids in the control treatment still acquired enough virus to launch a systemic  
705 infection in the plant, but aphids in the inhibitor treatment may have injected more initial  
706 virus inoculum, resulting in higher systemic titer in the infected plants. This observation  
707 may explain why PLRV has yet to evolve some mechanism to avoid binding C1QBP



708 since, even though it is a negative regulator, C1QBP does not adversely affect  
709 transmission rate and ultimately, virus spread. In fact, as obligate biotrophs, viruses must  
710 carefully regulate their replication to not kill their host. Therefore, the role of C1QBP in  
711 reducing virus titer in the insect and plant may not only protect the insect from too much  
712 virus, but also indirectly benefit or protect the plant host.

713         A limitation of our study is our inability to measure how much M36 entered into  
714 aphid cells. Importantly, no aphid mortality was observed during feeding on M36  
715 inhibitor. Functional genomics in aphids is a major challenge in the field. Gene silencing  
716 is incomplete in aphids, and the timing of silencing experiments are complex when  
717 coupled to studying phenotypes in virus transmission. Thus, working with inhibitors that  
718 have well characterized modes of action in other animals is an attractive alternative that  
719 allows us to probe protein function in virus transmission. However, inhibition of C1QBP  
720 by the M36 inhibitor could have had other unknown effects on the aphid. For example, if  
721 M36 increased aphid feeding, we would have also observed an increase in virus  
722 acquisition and transmission. Additional experiments, such as electrical penetration graph  
723 (EPG) assays, would be necessary to discern between these two possible scenarios.

724

## 725 **MATERIALS AND METHODS**

### 726 **Plants, Insects and Virus**

727 A parthenogenetically-reproducing clone of *M. persicae* Sulzer (red strain) (92) was  
728 maintained on *Physalis floridana* at a temperature of 20°C with a photoperiod of 16-hour  
729 day/8-hour night. Colonies of *Schizaphis graminum* genotypes SC and F (93) were reared  
730 on oats (cv. Coast Black) at 20°C in 24-hour light conditions. A cDNA infectious clone

731 of *Potato leafroll virus* (PLRV) developed by L. F. Franco-Lara et al. (94) was used to  
732 inoculate hairy nightshade (*Solanum saccharoides*, HNS) via agroinfiltration (95), which  
733 was used as a source of virus inoculum for all subsequent experiments. PLRV-infected  
734 HNS plants were used ~3-4 weeks post-infiltration when the disease symptom of  
735 interveinal chlorosis was visible on most leaves. Hairy nightshade plants were grown in  
736 growth chambers with a set temperature of 20°C and a photoperiod of 16-hour day/8-  
737 hour night. *Nicotiana benthamiana* used for microscopy and western analysis were grown  
738 under the same conditions described in (96).

739

#### 740 **Extraction of virus-vector protein complexes**

741 *M. persicae* were allowed a 48-hour acquisition access period (AAP) on PLRV-infected  
742 or healthy HNS under 24-hour light conditions. After collection, aphids were stored at -  
743 80°C for further use. Aphids pooled from 1 to 3 separate collections were cryogenically  
744 ground using a Mixer Mill MM 400 (Retsch). Approximately 2-4 g of tissue were ground  
745 in 10 mL MM 400 metal canisters with one 12 mm steel ball for 6 sets of 3 minutes at a  
746 vibrational frequency of 30 Hz with a five-minute liquid nitrogen cooling period in  
747 between grinding cycles. After cryogenic lysis, the resulting powder was stored at -80°C  
748 for far-western analysis and affinity purification.

749 For optimization of lysis buffer conditions by far-western blotting, cryogenically  
750 lysed powder from aphids fed on healthy HNS was split equally and solubilized in the  
751 following buffers on ice: filter sterilized CHAPS buffer = 1X phosphate buffered saline  
752 (PBS, pH7.4), 40 mM 3-[(3-cholamidopropyl)dimethylammonio]-1-propanesulfonate  
753 (CHAPS), 10 mM calcium chloride; HEPES buffer = 50 mM HEPES-KOH (pH 7.4), 110

754 mM KOAc, 2 mM MgCl<sub>2</sub>, 0.4% TritonX-100; TBT buffer = 50 mM HEPES-KOH (pH  
755 7.4), 200 mM tris(hydroxymethyl)aminomethane (Tris, pH7.5), 110 mM KOAc, 2 mM  
756 MgCl<sub>2</sub>, 0.4% TritonX-100, 0.1% Tween-20, 350 mM sodium chloride; TRIS buffer = 50  
757 mM Tris (pH7.5), 150 mM sodium chloride, 0.4% TritonX-100; SDS = 50 mM Tris (pH  
758 6.8), 2.5 % Sodium dodecyl sulfate, 10% glycerol. All buffers were supplemented with  
759 0.5 mM phenylmethylsulfonyl fluoride (PMSF) (Sigma-Aldrich) and a 1:100 (v/v)  
760 dilution of Halt™ EDTA-free protease inhibitor cocktail (PI) (Pierce). One milliliter of  
761 buffer was added to 200 milligrams of powder and incubated on ice for 10 minutes, with  
762 vigorous vortexing every 2 minutes. Samples were then centrifuged at 16,100 x g for 10  
763 minutes at 4 °C. Supernatant was moved to a fresh tube, photographed and stored on ice  
764 for far-western analysis.

765

#### 766 **Far-western analysis**

767 The supernatants from the different lysis buffer extractions described above were diluted  
768 1:4 in 4x Laemmli sample buffer (Bio-Rad) supplemented with beta-mercaptoethanol  
769 following manufacture's instructions. Samples were incubated at 95°C for 10 minutes  
770 followed by centrifugation at 16,100 x g for 1 minute at room temperature. Forty µL of  
771 the CHAPS, HEPES and TBT extractions and 20 µL from the TRIS and SDS samples  
772 were separated side-by-side on two separate pre-cast 4-20% TGX gradient gels (Bio-Rad)  
773 by SDS-PAGE and proteins transferred to nitrocellulose following the protocol described  
774 in (40). Blots were then blocked for 15 minutes in TBS with 2% (v/v) Tween 20 (-T)  
775 followed by an overnight block in 5% non-fat dried milk in TBS-T (0.1%), gently  
776 rocking at room temperature. Blots were washed briefly in 1x TBS-T (0.1%) and

777 incubated with 10 mL of 1x TBS-T (0.1%) supplemented with 8.6  $\mu$ g of gradient purified  
778 PLRV (97) or TBS-T (0.1%) without virus (negative control) overnight at 4°C, with  
779 gentle rotation. The next day, blots were washed four times in TBS-T (0.1%) for 10  
780 minutes each at room temperature and then incubated for 1 hour at room temperature  
781 with a 1:2500 dilution (TBS-T 0.1% supplemented with 0.1% BSA) of the PLRV  
782 primary antibody described in (42). Antibody was removed and blots washed again as  
783 described above. A 1:2500 dilution of alkaline phosphatase conjugated  $\alpha$ -rabbit  
784 secondary antibody (Sigma) in TBS-T 0.1% supplemented with 0.1% BSA was applied  
785 and blots incubated for 2 hours at room temperature followed by the washing procedure  
786 described above with the addition of a final 10 min, room temperature wash in TBS.  
787 Blots were incubated with 1-Step™ NBT/BCIP substrate solution (Thermo Scientific) for  
788 exactly 1 minute 47 seconds and washed quickly with deionized water to stop  
789 development.

790

### 791 **Affinity purification**

792 For each biological replicate, four grams of cryogenically-lysed *M. persicae* tissue  
793 (viruliferous or non-viruliferous) was solubilized in 20 mL of the TRIS extraction buffer  
794 described above. For APs with the phosphatase inhibitor, the protease inhibitor cocktail  
795 was replaced with the same amount of Halt™ Protease and phosphatase inhibitor single-  
796 use cocktail, EDTA-free (Pierce). Total protein was extracted following the lysis protocol  
797 outlined in (40) with a few exceptions. Samples were incubated at 4°C for ~20 minutes  
798 on ice with occasional vortexing. Tissue was then homogenized in buffer, on ice, with a  
799 Polytron (Brinkmann Instruments) for two, 10-second pulses at setting “2” separated by a

800 30-second incubation on ice. Lysates were then rotated at 4°C for 10 minutes. The  
801 resulting homogenate was moved to a glass Corex centrifuge tube and centrifuged for 10  
802 min at 4°C in a Beckman Avanti J-25 I centrifuge in a JA-20 rotor to remove cell debris.  
803 The speed of centrifugation varied for each AP experiment. The April samples were  
804 centrifuged twice at 3500 rpm (1,480 x g) and once at 6000 rpm (4,355 x g). For the  
805 January dataset, biological replicates 1 (JMPH1 and JMPW1) were centrifuged once at  
806 6000 rpm (4,355 x g). All other January biological replicates and APs from the  
807 Phosphatase Inhibitor dataset were centrifuged once at 8000 rpm (7,740 x g). Each  
808 independent dataset consisted of three biological replicate APs for viruliferous and non-  
809 viruliferous controls. Biological replicates were separate collections of pooled aphids fed  
810 on a group of systemically infected or healthy HNS plants.

811 For all APs analyzed by mass spectrometry, after centrifugation, the aqueous  
812 layer was removed and diluted 1:2 in fresh TRIS extraction buffer on ice. Five milligrams  
813 of  $\alpha$ -PLRV conjugated M-270 epoxy Dynabeads™ (Invitrogen) were rotated with 10 mL  
814 of the diluted aphid homogenate for 1 hour at 4°C and beads washed with TRIS  
815 extraction buffer as described in (40). Final wash buffer was completely removed from  
816 magnetic beads and captured proteins were subjected to on-bead reduction, alkylation and  
817 trypsin digestion following the protocol outlined in (42). Smaller volume APs (1 mg  
818 beads per 2 mL of diluted homogenate) were done in parallel for each of the three  
819 independent AP datasets and analyzed by Western analysis to gauge the enrichment of  
820 PLRV structural proteins (40).

821

822 **Mass spectrometry and data analysis**

823 For AP samples, tryptic peptides were reconstituted and analyzed on an Orbitrap  
824 Fusion Tribrid mass spectrometer (Thermo Scientific) following the parameters described  
825 in (42). Each affinity purification sample was analyzed a total of three times. For two of  
826 the analytical replicates, the fragment ions were analyzed in the linear trap using “rapid”  
827 scan rate. For the third analytical replicate, fragment ions were analyzed in the Orbitrap.  
828 Two analytical replicates for the April dataset were analyzed months prior to the January  
829 and Phosphatase Inhibitor datasets but a third analytical replicate from the April dataset  
830 ( $MS^2$  captured in the linear trap) was analyzed alongside all samples from the two other  
831 datasets.

832 Protein identification of resulting mass spectrometry data from APs was  
833 conducted as described in (42) with a few exceptions. The protein search database was  
834 generated from amino acid sequences corresponding to all coding gene sequences from  
835 the *Myzus persicae* G006 genome assembly v1.0 obtained from AphidBase  
836 ([https://bipaa.genouest.org/sp/myzus\\_persicae\\_g006/](https://bipaa.genouest.org/sp/myzus_persicae_g006/)) on the Bioinformatics Platform for  
837 Agroecosystems Arthropods (BIPAA) website prior to its formal release as well as  
838 sequences from all known species of *Luteoviridae* and common mammalian AP  
839 contaminant proteins downloaded from NCBI. Mascot search parameters were changed  
840 slightly from those outlined in (42) so that the mass measurement accuracy was set at 0.5  
841 Da or 0.02 Da for fragment ions for analytical replicates where  $MS^2$  spectra were  
842 collected in the linear trap or Orbitrap, respectively.

843 Mascot search results for APs were imported into Scaffold-Q+ version 4.8.9 for  
844 label free quantification by spectral counting using the protein cluster feature with the  
845 following identification filter thresholds: two-peptide minimum and a 1% false discovery

846 rate on both the peptide and protein level. Vector proteins with significant overlapping  
847 shared-peptide evidence that were identified as a cluster were treated as a proxy for a  
848 single identification, and total spectral counts were calculated on the level of the whole  
849 cluster with the protein reference number listed corresponding to the protein with the  
850 most unique peptides assigned in the cluster. Precursor ion (MS1) peak areas for peptides  
851 corresponding to selected proteins (Table S2) were measured using Skyline (98).  
852 Statistical analysis of AP-MS datasets was done using the T-test and ANOVA features in  
853 Scaffold-Q+ and Significance Analysis of Interactome (SAINT) Express probability  
854 scoring through the crapome.org web interface (47).

855       Shotgun MS analysis comparing C1QBP protein levels between viruliferous and  
856 non-viruliferous aphids reared on physalis was conducted and data analyzed exactly as  
857 described in (51) for comparing proteins differentially regulated in physalis- and turnip-  
858 reared *M. persicae*.

859

## 860 **Yeast-two-hybrid**

861 Total mRNA was purified from a pool of *S. graminum* aphids, genotype F2-A3, an  
862 efficient vector of CYDV-RPV (93), reared on RPV-infected plants using the RNeasy  
863 Plant extraction kit (Qiagen) followed by capture with oligo-dT magnetic-beads  
864 (PolyATtract(R) mRNA Isolation Systems, Promega). A full-body cDNA library was  
865 constructed from the *S. graminum* RNA in the BD Matchmaker AD cloning vector  
866 (pGADT7-Rec, BD Biosciences Clontech) following the manufacturer's instructions, and  
867 transformed in yeast strain AH109. The transformed cells were plated on synthetic  
868 dropout (SD) selection media lacking leucine (SD-Leu). Transformants were recovered

869 and pooled in freezing medium as 1 mL aliquots with a concentration above  $2 \times 10^7$   
870 cells/mL were stored at  $-80^\circ\text{C}$ . The coat protein (CP) and readthrough domain (RTD)  
871 genes of BYDV-PAV, CYDV-RPV and PLRV were cloned separately into a DNA-BD  
872 fusion vector (pGBKT7, BD Biosciences Clontech) and transformed in yeast strain Y187.

873 The *S. graminum* cDNA library was screened by separately mating with the  
874 Y187 luteovirid coat protein strains following manufacture guidelines. Briefly, one  
875 aliquot of AH109-library ( $\geq 2 \times 10^7$  cells) was combined with each Y187-bait culture and  
876 incubated for 24 hours at  $30^\circ\text{C}$  in 45 mL 2x YPDA supplemented with Kanamycin (50  
877  $\mu\text{g}/\text{mL}$ , Kan). The mating mixture was centrifuged and resuspended in 10 mL of 0.5x  
878 YPDA/Kan (50  $\mu\text{g}/\text{mL}$ ) and plated on SD selection media lacking tryptophan, leucine,  
879 and histidine (SD-Trp/-Leu/-His). Positive clones (yeast colonies growing on SD/-Trp/-  
880 Leu/-His media) were subcultured on SD/-Trp/-Leu/-His/-Ade containing X- $\alpha$ -Gal (0.4  
881 mg/mL) to detect strong, positive interactions. Plasmid was extracted from positive  
882 clones, re-transformed into DH5 $\alpha$  *E. coli* cells by heat shock, and cloned cDNA  
883 sequences identified by Sanger sequencing using pGAD Rec T7-specific primers. The  
884 resulting sequences were compared against EMBL and GenBank sequences using  
885 BLAST. The ability of candidate proteins from the *S. graminum* cDNA library to interact  
886 with PAV, RPV or PLRV CP or RTD proteins was confirmed using the co-  
887 transformation approach. Co-transformation with DNA-BD fusions of human lamin C  
888 and the murine p53 was used as negative controls.

889

### 890 **Sequence alignment and phylogenetic analysis**

891 Orthologous protein sequences for MpC1QBP were identified using NCBI BLAST,



892 which calculates percent identity and similarity. Sequence alignments were generated  
893 using the Clustal Omega Multiple Sequence Alignment web interface  
894 (<https://www.ebi.ac.uk/Tools/msa/clustalo/>) and visualized with BoxShade  
895 ([https://embnet.vital-it.ch/software/BOX\\_form.html](https://embnet.vital-it.ch/software/BOX_form.html)). Phylogenetic analysis was  
896 performed using the one-click mode of the Phylogeny.fr web tool  
897 (<https://www.phylogeny.fr/>) without Gblocks curation. NCBI or citrusgreening.org  
898 accession numbers for protein sequences used are: XP\_026823488.1 (*Rhopalosiphum*  
899 *maidis*), XP\_025194941.1 (*Melanaphis sacchari*), XP\_027842714.1 (*Aphis gossypii*),  
900 NP\_001233078.1 (*Acyrtosiphon pisum*), XP\_015380335.1 (*Diuraphis noxia*),  
901 XP\_025410594.1 (*Sipha flava*), DcitrP057835.1.1 (*Diaphorina citri*), RZF37806.1  
902 (*Laodelphax striatellus*), XP\_014240636.1 (*Cimex lectularius*), XP\_018897713.1  
903 (*Bemisia tabaci*), XP\_012542024.1 (*Monomorium pharaonis*), ETN58839.1 (*Anopheles*  
904 *darling*), NP\_611243.1 (*Drosophila melanogaster*), NP\_001203.1 (*Homo sapiens*),  
905 NP\_001320214.1 (*Arabidopsis thaliana*), KZV10545.1 (*Saccharomyces cerevisiae*).

906

### 907 **Immunolocalization in aphids**

908 Adult and late instar *M. persicae* were caged on detached PLRV-infected or uninfected  
909 HNS leaves for 48 hours in 24-hour light conditions. Guts from aphids exposed and not  
910 exposed to PLRV were dissected into PBS. Guts were fixed in 4% formaldehyde for 30-  
911 45 minutes before being permeabilized with 0.1% (v/v) Triton X-100 for 2 hours. Guts  
912 were washed with PBS-T (PBS, 0.5% (v/v) Tween 20) 3 times and blocked for 2-3 hours  
913 in PBS-T, 1% (m/v) BSA. After blocking, guts were incubated with cross-absorbed  $\alpha$ -  
914 PLRV diluted 1:1000 in blocking buffer (PBS-T, 1% BSA), 1:50 polyclonal antibody

915 against full-length human C1QBP ( $\alpha$ -HsC1QBP) derived from mouse (Sigma-Aldrich),  
916 or both overnight at 4°C. Guts were washed 5 times in PBS-T and incubated in secondary  
917 antibody, 1:500 donkey  $\alpha$ -rabbit-Cy3 (Millipore Sigma), or 1:250 donkey  $\alpha$ -mouse-Cy2  
918 (Jackson ImmunoResearch), diluted in blocking buffer for 1 hour. Guts were washed 5  
919 times in PBS-T and then mounted on slides in Fluoromount plus 4',6-diamidino-2-  
920 phenylindole nuclear stain (DAPI, Southern Biotech) and sealed with a cover slip. Guts  
921 were visualized with a Leica TCS SP5 laser scanning confocal microscope. Cy2 was  
922 excited with the 488-nm line of a multiline Argon laser with emission spectra collected  
923 by a photomultiplier tube (PMT) detector in the range of 545-550 nm (Fig. 8B, D) or a  
924 hybrid detector (HyD) in the range of 500-530 nm (Fig. 8C, E). Cy3 was excited with the  
925 561-nm line of multiline Argon laser with emission spectra collected by a HyD in the  
926 range of 604-631 nm. DAPI was excited by a 405-nm ultraviolet laser with emission  
927 spectra collected by a HyD in the range of 445-479nm. All scans were conducted  
928 sequentially with line averaging of 6 or 8. Non-viruliferous guts stained with  $\alpha$ -C1QBP  
929 and  $\alpha$ -PLRV as well as viruliferous guts stained with only secondary antibodies were  
930 used as negative controls. The experiment was repeated independently twice.

931

### 932 **Ectopic expression in plants**

933 The full-length coding sequence of *C1QBP* without a stop codon was amplified from *M.*  
934 *persicae* cDNA with Phusion™ High-Fidelity DNA polymerase (Thermo Scientific)  
935 following manufacture's guidelines with the following primers, Forward: 5'-  
936 GGGGACAAGTTTGTACAAAAAAGCAGGCTTAATGAATACTTTAATCAGATCG  
937 and Reverse: 5' –

938 GGGGACCACTTTGTACAAGAAAGCTGGGTGAAAAAATTCCTTAAATCA – 3’.

939 Underlined nucleotides correspond to the MpC1QBP sequence fused to attB Gateway™  
940 cloning sites. The resulting amplicon was cloned into the pEarleyGate 101 destination  
941 vector (99) using Gateway™ technology (Invitrogen) as described in (96) to create the  
942 p35s:MpC1QBP-YFP construct. This construct was transiently expressed via  
943 agroinfiltration with the organelle markers, COX4-mCherry, Man49-mCherry or  
944 mCherry-Rab7 (63) in *N. benthamiana* epidermal cells and imaged 3 days post-  
945 infiltration with a Leica TCS SP5 laser scanning confocal microscope as described in  
946 (96).

947

#### 948 **Chemical Inhibition of C1QBP**

949 *M. persicae* aphids were collected and starved for 1-2 hours before being placed on  
950 artificial sucrose diet (51) containing 0, 50, 100, or 200 µM of a small molecular inhibitor  
951 of human C1QBP (65) resuspended in water, diluted in sucrose diet and 0.1% dimethyl  
952 sulfoxide (DMSO) in a membrane feeding sachet. After 48 hours of feeding on the  
953 inhibitor, aphids were moved to detached PLRV-infected or uninfected HNS leaves for a  
954 24-hour AAP. Then, aphids were moved to 3-week-old potato cv. Red Maria seedlings, 5  
955 aphids per plant, 12-15 plants per treatment, for a 72-hour inoculation access period  
956 (IAP). After the IAP, aphids were removed with an application of pymetrozine  
957 (Endeavor) and bifenthrin (Talstar P). Two- and four-weeks post inoculation potato  
958 plants were assessed for systemic PLRV infection and titer. Four leaf discs were taken  
959 from the youngest fully emerged leaf on the apical stem of the potato plants and used for  
960 double antibody sandwich enzyme-linked immunosorbent assays (DAS-ELISA) with a

961 commercially available PLRV antibody kit (Agdia). The transmission assay was repeated  
962 independently three times.

963 For virus acquisition experiments, aphids were fed on sucrose diets containing 0  
964 or 200  $\mu$ M of inhibitor for 48 hours and then moved to a PLRV-infected HNS leaf for 24-  
965 hour AAP (as in the transmission assay). After the AAP, aphids were moved to fresh  
966 sucrose diet for 3 days gut clearing to remove any residual PLRV in their gut lumen so  
967 any detected PLRV was acquired across the midgut of the insects. After gut-clearing,  
968 individual aphids ( $n = 12-15$ ) were collected and flash frozen at  $-80^{\circ}\text{C}$ . RNA was  
969 extracted from the aphids using the RNeasy Mini Kit (Qiagen) and cDNA was  
970 synthesized from 0.1  $\mu$ g of aphid RNA using the iScript cDNA Synthesis Kit (Bio-Rad).  
971 PLRV titer in undiluted cDNA was quantified by digital drop PCR using EvaGreen  
972 Supermix and the QX100 droplet digital PCR system as previously described (51).

973

#### 974 **Statistical Analysis**

975 PLRV transmission efficiency after aphid exposure to the inhibitor was analyzed using  
976 logistic regression. The model predicts whether an inoculated plant will become infected  
977 based on different predictors. A one-tailed likelihood ratio test showed that experiment  
978 could be removed from the model ( $P = 0.578$ ). Therefore, the model has the sole  
979 predictor: treatment. The full model, model diagnostics, test statistics, and  $P$ -values are  
980 reported in Table S3. PLRV titer in inoculated plants was analyzed with a linear mixed  
981 effects analysis of variance using Satterthwaite's method. Inhibitor concentration was  
982 used as a fixed effect and experiment as a random effect. Linear contrasts were  
983 performed using Dunnett's test. For PLRV titer in the insects, the differences in titer

984 between the two treatments was compared using a one-side, unpaired Student's *t* test.  
985 Letters represent statistically different groups ( $P < 0.05$ ). All error bars represent  $\pm$  one  
986 standard error. All indicated analyses were performed in R version 3.6.3 ([https://www.r-](https://www.r-project.org/)  
987 [project.org/](https://www.r-project.org/)).

988

### 989 **MS Data Availability**

990 Heck, M. (2020) Isolation of aphid-*Potato leafroll virus* (PLRV) proteins complexes  
991 from viruliferous insects using affinity purification-mass spectrometry. Available from  
992 ProteomeXchange.org using the project identifier PXD022167.

993

### 994 **ACKNOWLEDGMENTS**

995 The authors would like to thank the following: former technicians Dawn Smith, Ana Rita  
996 Rebelo, and Rogerio Santos for their help in the care and collection of insects;  
997 technicians Maria G. Gutierrez, Myah Frostclapp, and the BTI and Cornell greenhouse  
998 staff for plant care; Jason Ingram (USDA-ARS) for application of pesticides. John  
999 Flaherty and the IT staff of Cornell University's Biotechnology Department for help with  
1000 Mascot support; Maria Harrison (BTI) and Sergey Ivanov for use of their mCherry  
1001 organelle marker constructs; Mamta Srivastava (BTI, Plant Cell Imaging Center) for  
1002 technical help with imaging and microscopy software.

1003 This work was supported by USDA ARS CRIS project 8062-22410-006-00-D, USDA  
1004 NIFA project 8062-22410-006-15-A. J.R.W. is supported by an NSF Graduate Research  
1005 Fellowship (DGE-1650441) and a NIFA Predoctoral Fellowship (2019-67011-29610).

1006

1007     **REFERENCES**

1008

- 1009     1.     Nault LR. 1997. Arthropod transmission of plant viruses: A new synthesis.  
1010           Annals of the Entomological Society of America 90:521-541.
- 1011     2.     Gray SM, Banerjee N. 1999. Mechanisms of arthropod transmission of plant and  
1012           animal viruses. Microbiol Mol Biol Rev 63:128-148.
- 1013     3.     Brault V, Herrbach E, Reinbold C. 2007. Electron microscopy studies on  
1014           luteovirid transmission by aphids. Micron 38:302-312.
- 1015     4.     Gildow FE. 1987. Virus-membrane interactions involved in circulative  
1016           transmission of luteoviruses by aphids, p 93-120. *In* Harris KF (ed), Current  
1017           Topics in Vector Research, vol 4. Springer-Verlag, New York.
- 1018     5.     Gildow FE. 1993. Evidence for receptor-mediated endocytosis regulating  
1019           luteovirus acquisition by aphids. Phytopathology 83:270-277.
- 1020     6.     Garret A, Kerlan C, Thomas D. 1996. Ultrastructural study of acquisition and  
1021           retention of potato leafroll luteovirus in the alimentary canal of its aphid vector,  
1022           *Myzus persicae* Sulz. Arch Virol 141:1279-1292.
- 1023     7.     Garret A, Kerlan C, Thomas D. 1993. The intestine is a site of passage for potato  
1024           leafroll virus from the gut lumen into the haemocoel in the aphid vector, *Myzus*  
1025           *persicae* Sulz. Arch Virol 131:377-392.
- 1026     8.     Peiffer ML, Gildow FE, Gray SM. 1997. Two distinct mechanisms regulate  
1027           luteovirus transmission efficiency and specificity at the aphid salivary gland. J  
1028           Gen Virol 78 ( Pt 3):495-503.
- 1029     9.     Rochow WF. 1969. Biological properties of four isolates of barley yellow dwarf  
1030           virus. Phytopathology 59:1580-1589.
- 1031     10.    Götz M, Popovski S, Kollenberg M, Gorovitz R, Brown JK, Cicero J, Czosnek H,  
1032           Winter S, Ghanim M. 2012. Implication of *Bemisia tabaci* heat shock protein 70  
1033           in begomovirus - whitefly interactions. J Virol 86:13241-13252.
- 1034     11.    Kanakala S, Ghanim M. 2016. Implication of the whitefly *Bemisia tabaci*  
1035           cyclophilin B protein in the transmission of *Tomato yellow leaf curl virus*. Front  
1036           Plant Sci 7:1702.
- 1037     12.    Li C, Cox-Foster D, Gray SM, Gildow F. 2001. Vector specificity of *Barley*  
1038           *yellow dwarf virus* (BYDV) transmission: identification of potential cellular  
1039           receptors binding BYDV-MAV in the aphid, *Sitobion avenae*. Virology 286:125-  
1040           133.
- 1041     13.    Liang Y, Gao X. 2017. The cuticle protein gene MPCP4 of *Myzus persicae*  
1042           (Homoptera: Aphididae) plays a critical role in *Cucumber mosaic virus*  
1043           acquisition. J Econ Entomol 110:848-853.
- 1044     14.    Liu W, Gray S, Huo Y, Li L, Wei T, Wang X. 2015. Proteomic analysis of  
1045           interaction between a plant virus and its vector insect reveals new functions of  
1046           hemipteran cuticular protein. Mol Cell Proteomics 14:2229-2242.
- 1047     15.    Webster CG, Pichon E, van Munster M, Monsion B, Deshoux M, Gargani D,  
1048           Calvero F, Jimenez J, Moreno A, Krenz B, Thompson JR, Perry KL, Fereres A,  
1049           Blanc S, Uzest M. 2018. Identification of plant virus receptor candidates in the  
1050           stylets of their aphid vectors. J Virol 92:e00432-00418.

- 1051 16. Xu Y, Wu J, Fu S, Li C, Zhu Z-R, Zhou X, Simon A. 2015. *Rice stripe tenuivirus*  
1052 nonstructural protein 3 hijacks the 26S proteasome of the small brown  
1053 planthopper via direct interaction with regulatory particle non-ATPase subunit 3.  
1054 J Virol 89:4296-4310.
- 1055 17. Wilson JR, DeBlasio SL, Alexander MM, Heck M. 2020. Looking through the  
1056 lens of 'omics technologies: Insights into the transmission of insect vector-borne  
1057 plant viruses. Current Issues in Molecular Biology  
1058 doi:10.21775/cimb.034.113:113-144.
- 1059 18. Mulot M, Monsion B, Boissinot S, Rastegar M, Meyer S, Bochet N, Brault V.  
1060 2018. Transmission of *Turnip yellows virus* by *Myzus persicae* is reduced by  
1061 feeding aphids on double-stranded RNA targeting the ephrin receptor protein.  
1062 Front Microbiol 9:457.
- 1063 19. Linz LB, Liu S, Chougule NP, Bonning BC. 2015. *In vitro* evidence supports  
1064 membrane alanyl aminopeptidase N as a receptor for a plant virus in the pea aphid  
1065 vector. J Virol 89:11203-11212.
- 1066 20. Tamborindéguy C, Bereman MS, Igwe D, Deblasio S, Smith D, White F,  
1067 MacCoss M, Gray S, Cilia M. 2013. Genomic and proteomic analysis of  
1068 *Schizaphis graminum* reveals cyclophilin is involved in the transmission of Cereal  
1069 yellow dwarf virus. PLoS One:e71620.
- 1070 21. Woolston CJ, Covey SN, Penswick JR, Davies JW. 1983. Aphid transmission and  
1071 a polypeptide are specified by a defined region of the *Cauliflower mosaic virus*  
1072 genome. Gene 23:15-23.
- 1073 22. Pirone TP, Perry KL. 2002. Aphids: non-persistent transmission. Adv Bot Res  
1074 36:1-19.
- 1075 23. Badillo-Vargas IE, Chen Y, Martin KM, Rotenberg D, Whitfield AE. 2019.  
1076 Discovery of novel thrips vector proteins that bind to the viral attachment protein  
1077 of the plant bunyavirus tomato spotted wilt virus. J Virol 93:e00699-00619.
- 1078 24. Dombrovsky A, Gollop N, Chen S, Chejanovsky N, Racciah B. 2007. *In vitro*  
1079 association between the helper component-proteinase of *Zucchini yellow mosaic*  
1080 *virus* and cuticle proteins of *Myzus persicae*. J Gen Virol 88:1602-1610.
- 1081 25. Li S, Xiong R, Wang X, Zhou Y. 2011. Five proteins of *Laodelphax striatellus*  
1082 are potentially involved in the interactions between rice stripe virus and vector.  
1083 PLoS One 6:e26585.
- 1084 26. Seddas P, Boissinot S, Strub JM, Van Dorsselaer A, Van Regenmortel MH, Pattus  
1085 F. 2004. Rack-1, GAPDH3, and actin: proteins of *Myzus persicae* potentially  
1086 involved in the transcytosis of beet western yellows virus particles in the aphid.  
1087 Virology 325:399-412.
- 1088 27. van den Heuvel JF, Verbeek M, van der Wilk F. 1994. Endosymbiotic bacteria  
1089 associated with circulative transmission of potato leafroll virus by *Myzus*  
1090 *persicae*. J Gen Virol 75 ( Pt 10):2559-2565.
- 1091 28. Li S, Li X, Zhou Y. 2018. Ribosomal protein L18 is an essential factor that  
1092 promote *Rice stripe virus* accumulation in small brown planthopper. Virus Res  
1093 247:15-20.
- 1094 29. Mar T, Liu W, Wang X. 2014. Proteomic analysis of interaction between P7-1 of  
1095 *Southern rice black-streaked dwarf virus* and the insect vector reveals diverse  
1096 insect proteins involved in successful transmission. J Proteomics 102.

- 1097 30. Badillo-Vargas IE, Rotenberg D, Schneweis DJ, Hiromasa Y, Tomich JM,  
1098 Whitfield AE. 2012. Proteomic analysis of *Frankliniella occidentalis* and  
1099 differentially-expressed proteins in response to Tomato spotted wilt virus  
1100 infection. J Virol doi:JV1.00285-12 [pii]10.1128/JVI.00285-12.
- 1101 31. Brault V, Tanguy S, Reinbold C, Le Trionnaire G, Arneodo J, Jaubert-Possamai  
1102 S, Guernec G, Tagu D. 2010. Transcriptomic analysis of intestinal genes  
1103 following acquisition of pea enation mosaic virus by the pea aphid *Acyrtosiphon*  
1104 *pisum*. J Gen Virol 91:802-808.
- 1105 32. Cassone BJ, Wijeratne S, Michel AP, Stewart LR, Chen Y, Yan P, Redinbaugh  
1106 MG. 2014. Virus-independent and common transcriptome responses of leafhopper  
1107 vectors feeding on maize infected with semi-persistently and persistent  
1108 propagatively transmitted viruses. BMC Genomics 15:133.
- 1109 33. Shrestha A, Champagne DE, Culbreath AK, Rotenberg D, Whitfield AE,  
1110 Srinivasan R. 2017. Transcriptome changes associated with *Tomato spotted wilt*  
1111 *virus* infection in various life stages of its thrips vector, *Frankliniella fusca*  
1112 (Hinds). J Gen Virol 98:2156-2170.
- 1113 34. Wang L, Tang N, Gao X, Guo D, Chang Z, Fu Y, Akinyemi IA, Wu Q. 2016.  
1114 Understanding the immune system architecture and transcriptome responses to  
1115 *Southern rice black-streaked dwarf virus* in *Sogatella furcifera*. Sci Rep 6:36254.
- 1116 35. Cilia M, Tamborindeguy C, Fish T, Howe K, Thannhauser TW, Gray S. 2011.  
1117 Genetics coupled to quantitative intact proteomics links heritable aphid and  
1118 endosymbiont protein expression to circulative polerovirus transmission. J Virol  
1119 85:2148-2166.
- 1120 36. Papura D, Jacquot E, Dedryver CA, Luche S, Riault G, Bossis M, Rabilloud T.  
1121 2002. Two-dimensional electrophoresis of proteins discriminates aphid clones of  
1122 *Sitobion avenae* differing in BYDV-PAV transmission. Arch Virol 147:1881-  
1123 1898.
- 1124 37. Yang X, Thannhauser TW, Burrows M, Cox-Foster D, Gildow FE, Gray SM.  
1125 2008. Coupling genetics and proteomics to identify aphid proteins associated with  
1126 vector-specific transmission of polerovirus (luteoviridae). J Virol 82:291-299.
- 1127 38. Mauck K, Bosque-Perez NA, Eigenbrode SD, De Moraes CM, Mescher MC.  
1128 2012. Transmission mechanisms shape pathogen effects on host-vector  
1129 interactions: evidence from plant viruses. Functional Ecology 26:1162-1175.
- 1130 39. Heck M, Brault V. 2018. Targeted disruption of aphid transmission: a vision for  
1131 the management of crop diseases caused by *Luteoviridae* members. Curr Opin  
1132 Virol 33:24-32.
- 1133 40. DeBlasio SL, Johnson R, Mahoney J, Karasev A, Gray SM, MacCoss MJ, Cilia  
1134 M. 2015. Insights into the polerovirus-plant interactome revealed by  
1135 coimmunoprecipitation and mass spectrometry. Mol Plant Microbe Interact  
1136 28:467-481.
- 1137 41. DeBlasio SL, Johnson R, Sweeney MM, Karasev A, Gray SM, MacCoss MJ,  
1138 Cilia M. 2015. Potato leafroll virus structural proteins manipulate overlapping, yet  
1139 distinct protein interaction networks during infection. Proteomics 15:2098-2112.
- 1140 42. DeBlasio SL, Johnson RS, MacCoss MJ, Gray SM, Cilia M. 2016. Model system-  
1141 guided protein interaction mapping for virus isolated from phloem tissue. J  
1142 Proteome Res 15:4601-4611.



- 1143 43. Conlon FL, Miteva Y, Kaltenbrun E, Waldron L, Greco TM, Cristea IM. 2012.  
1144 Immunoisolation of protein complexes from *Xenopus*. *Methods Mol Biol*  
1145 917:369-390.
- 1146 44. Rogstad SM, Sorkina T, Sorkin A, Wu CC. 2013. Improved precision of  
1147 proteomic measurements in immunoprecipitation based purifications using  
1148 relative quantitation. *Anal Chem* 85:4301-4306.
- 1149 45. Choi H, Larsen B, Lin ZY, Breitkreutz A, Mellacheruvu D, Fermin D, Qin ZS,  
1150 Tyers M, Gingras AC, Nesvizhskii AI. 2011. SAINT: probabilistic scoring of  
1151 affinity purification-mass spectrometry data. *Nat Methods* 8:70-73.
- 1152 46. Skarra DV, Goudreault M, Choi H, Mullin M, Nesvizhskii AI, Gingras AC,  
1153 Honkanen RE. 2011. Label-free quantitative proteomics and SAINT analysis  
1154 enable interactome mapping for the human Ser/Thr protein phosphatase 5.  
1155 *Proteomics* 11:1508-1516.
- 1156 47. Teo G, Liu G, Zhang J, Nesvizhskii AI, Gingras A-C, Choi H. 2014.  
1157 SAINTexpress: Improvements and additional features in Significance Analysis of  
1158 INTERactome software. *Journal of Proteomics* 100:37-43.
- 1159 48. Old WM, Meyer-Arendt K, Aveline-Wolfe L, Pierce KG, Mendoza A, Sevinsky  
1160 JR, Resing KA, Ahn NG. 2005. Comparison of label-free methods for quantifying  
1161 human proteins by shotgun proteomics. *Mol Cell Proteomics* 4:1487-1502.
- 1162 49. Budayeva HG, Cristea IM. 2014. A mass spectrometry view of stable and  
1163 transient protein interactions. *806*:263-282.
- 1164 50. Ding T-B, Li J, Chen E-H, Niu J-Z, Chu D. 2019. Transcriptome profiling of the  
1165 whitefly *Bemisia tabaci* MED in response to single infection of *Tomato yellow*  
1166 *leaf curl virus*, *Tomato chlorosis virus*, and their co-infection. *Frontiers in*  
1167 *Physiology* 10.
- 1168 51. Pinheiro PV, Ghanim M, Alexander M, Rebelo A, Santos RS, Orsburn BC, Gray  
1169 S, Cilia M. 2017. Host plants indirectly influence plant virus transmission by  
1170 altering gut cysteine protease activity of aphid vectors. *Mol Cell Proteomics*  
1171 16:S230-S243.
- 1172 52. Hu M, Crawford Simon A, Henstridge Darren C, Ng Ivan HW, Boey Esther JH,  
1173 Xu Y, Febbraio Mark A, Jans David A, Bogoyevitch Marie A. 2013. p32 protein  
1174 levels are integral to mitochondrial and endoplasmic reticulum morphology, cell  
1175 metabolism and survival. *Biochemical Journal* 453:381-391.
- 1176 53. McGee AM, Douglas DL, Liang Y, Hyder SM, Baines CP. 2014. The  
1177 mitochondrial protein C1qbp promotes cell proliferation, migration and resistance  
1178 to cell death. *Cell Cycle* 10:4119-4127.
- 1179 54. Scully OJ, Yu Y, Salim A, Thike AA, Yip GW, Baeg GH, Tan PH, Matsumoto K,  
1180 Bay BH. 2015. Complement component 1, q subcomponent binding protein is a  
1181 marker for proliferation in breast cancer. *Exp Biol Med (Maywood)* 240:846-853.
- 1182 55. Zhang X, Zhang F, Guo L, Wang Y, Zhang P, Wang R, Zhang N, Chen R. 2013.  
1183 Interactome analysis reveals that C1QBP (complement component 1, q  
1184 subcomponent binding protein) is associated with cancer cell chemotaxis and  
1185 metastasis. *Mol Cell Proteomics* 12:3199-3209.
- 1186 56. Hillman GA, Henry MF. 2019. The yeast protein Mam33 functions in the  
1187 assembly of the mitochondrial ribosome. *Journal of Biological Chemistry*  
1188 294:9813-9829.

- 1189 57. Muta J, Kang D, Kitajima S, Fugiwara T, Hamasaki N. p32 protein, a splicing  
1190 factor 2-associated protein, is localized in mitochondrial matrix and is  
1191 functionally important in maintaining oxidative phosphorylation. *J Biol Chem*  
1192 272:24363–24370.
- 1193 58. Barna J, Dimén D, Puska G, Kovács D, Csikós V, Oláh S, Udvari EB, Pál G,  
1194 Dobolyi Á. 2019. Complement component 1q subcomponent binding protein in  
1195 the brain of the rat. *Scientific Reports* 9.
- 1196 59. Soltys BJ, Kang D, Gupta RS. 2000. Localization of P32 protein (gC1q-R) in  
1197 mitochondria and at specific extramitochondrial locations in normal tissues.  
1198 *Histochem Cell Biol* 114:245-255.
- 1199 60. Matthews DA, Russell WC. 1998. Adenovirus core protein V interacts with p32--  
1200 a protein which is associated with both the mitochondria and the nucleus. *J Gen*  
1201 *Virol* 79 1677-1685.
- 1202 61. van Leeuwen HC, O'Hare P. 2001. Retargeting of the mitochondrial protein  
1203 p32/gC1Qr to a cytoplasmic compartment and the cell surface. *J Cell Sci*  
1204 114:2115-2123.
- 1205 62. Wang Y, Finan JE, Middeldorp JM, Hayward SD. 1997. P32/TAP, a cellular  
1206 protein that interacts with EBNA-1 of Epstein-Barr virus. *Virology* 236:18-29.
- 1207 63. Ivanov S, Harrison MJ. 2014. A set of fluorescent protein-based markers  
1208 expressed from constitutive and arbuscular mycorrhiza-inducible promoters to  
1209 label organelles, membranes and cytoskeletal elements in *Medicago truncatula*.  
1210 *Plant J* 80:1151-1163.
- 1211 64. Negi S, Pandey S, Srinivasan SM, Mohammed A, Guda C. 2015. LocSigDB: a  
1212 database of protein localization signals. *Database* 2015:bav003-bav003.
- 1213 65. Yenugonda V, Nomura N, Kouznetsova V, Tsigelny I, Fogal V, Nurmammedov  
1214 E, Kesari S, Babic I. 2017. A novel small molecule inhibitor of p32 mitochondrial  
1215 protein overexpressed in glioma. *Journal of Translational Medicine* 15.
- 1216 66. Mellacheruvu D, Wright Z, Couzens AL, Lambert JP, St-Denis NA, Li T, Miteva  
1217 YV, Hauri S, Sardu ME, Low TY, Halim VA, Bagshaw RD, Hubner NC, Al-  
1218 Hakim A, Bouchard A, Faubert D, Fermin D, Dunham WH, Goudreault M, Lin  
1219 ZY, Badillo BG, Pawson T, Durocher D, Coulombe B, Aebersold R, Superti-  
1220 Furga G, Colinge J, Heck AJ, Choi H, Gstaiger M, Mohammed S, Cristea IM,  
1221 Bennett KL, Washburn MP, Raught B, Ewing RM, Gingras AC, Nesvizhskii AI.  
1222 2013. The CRAPome: a contaminant repository for affinity purification-mass  
1223 spectrometry data. *Nat Methods* 10:730-736.
- 1224 67. Cilia M, Johnson R, Sweeney M, DeBlasio SL, Bruce JE, MacCoss MJ, Gray SM.  
1225 2014. Evidence for lysine acetylation in the coat protein of a poliovirus. *J Gen*  
1226 *Virol* 95:2321-2327.
- 1227 68. Alexander MM, Mohr JP, DeBlasio SL, Chavez JD, Ziegler-Graff V, Brault V,  
1228 Bruce JE, Heck MC. 2017. Insights in luteovirid structural biology guided by  
1229 chemical cross-linking and high resolution mass spectrometry. *Virus Res* 241:42-  
1230 52.
- 1231 69. Patton MF, Bak A, Sayre JM, Heck ML, Casteel CL. 2019. A poliovirus, Potato  
1232 leafroll virus, alters plant–vector interactions using three viral proteins. *Plant, Cell*  
1233 *& Environment* 43:387-399.

- 1234 70. Tahtouh M, Garcon-Bocquet A, Croq F, Vizioli J, Sautiere P, Van Camp C,  
1235 Salzet M, Meillour PN, Pestel J, Lefebvre C. 2012. Interaction of *HmC1q* with  
1236 leech microglial cells: involvement of C1qBP-related molecule in the induction of  
1237 cell chemotaxis. *J Neuroinflammation* 9:37.
- 1238 71. Feichtinger RG, Oláhová M, Kishita Y, Garone C, Kremer LS, Yagi M, Uchiumi  
1239 T, Jourdain AA, Thompson K, D'Souza AR, Kopajtich R, Alston CL, Koch J,  
1240 Sperl W, Mastantuono E, Strom TM, Wortmann SB, Meitinger T, Pierre G,  
1241 Chinnery PF, Chrzanowska-Lightowlers ZM, Lightowlers RN, DiMauro S, Calvo  
1242 SE, Mootha VK, Moggio M, Sciacco M, Comi GP, Ronchi D, Murayama K,  
1243 Ohtake A, Rebelo-Guiomar P, Kohda M, Kang D, Mayr JA, Taylor RW, Okazaki  
1244 Y, Minczuk M, Prokisch H. 2017. Biallelic *C1QBP* mutations cause severe  
1245 neonatal-, childhood-, or later-onset cardiomyopathy associated with combined  
1246 respiratory-chain deficiencies. *The American Journal of Human Genetics*  
1247 101:525-538.
- 1248 72. Jiang J, Zhang Y, Krainer AR, Xu R. 1999. Crystal structure of human p32, a  
1249 doughnut-shaped acidic mitochondrial matrix protein. *Proc Natl Acad Sci U S A*  
1250 96:3572–3577.
- 1251 73. Gotoh K, Morisaki T, Setoyama D, Sasaki K, Yagi M, Igami K, Mizuguchi S,  
1252 Uchiumi T, Fukui Y, Kang D. 2018. Mitochondrial p32/C1qbp Is a Critical  
1253 Regulator of Dendritic Cell Metabolism and Maturation. *Cell Reports* 25:1800-  
1254 1815.e1804.
- 1255 74. Krainer AR, Mayeda A, Kozak D, Binns G. 1991. Functional expression of  
1256 cloned human splicing factor SF2: homology to RNA-binding proteins, UI 70K,  
1257 and *Drosophila* splicing regulators. *Cell* 66.
- 1258 75. Son M, Diamond B, Santiago-Schwarz F. 2015. Fundamental role of C1q in  
1259 autoimmunity and inflammation. *Immunologic Research* 63:101-106.
- 1260 76. Xiao K, Wang Y, Chang Z, Lao Y, Chang DC. 2014. p32, a novel binding partner  
1261 of Mcl-1, positively regulates mitochondrial Ca(2+) uptake and apoptosis.  
1262 *Biochem Biophys Res Commun* 451:322-328.
- 1263 77. Yu L, Zhang Z, Loewenstein PM, Desai K, Tang Q, Mao D, Symington JS, Green  
1264 M. 1995. Molecular cloning and characterization of a cellular protein that  
1265 interacts with the Human Immunodeficiency Virus Type 1 Tat transactivator and  
1266 encodes a strong transcriptional activation domain. *J Virol* 69:3007–3016.
- 1267 78. Zhang X, Zhang F, Guo L, Wang Y, Zhang P, Wang R, Zhang N, R. C. 2013.  
1268 Interactome analysis reveals that C1QBP (complement component 1, q  
1269 subcomponent binding protein) Is associated with cancer cell chemotaxis and  
1270 metastasis. *Molecular and Cellular Proteomics* 12:3199-3209.
- 1271 79. Ghebrehiwet B, Lim BL, Peerschke EI, Willis AC, KB R. 1994. Isolation, cDNA  
1272 cloning, and overexpression of a 33-kD cell surface glycoprotein that binds to the  
1273 globular "heads" of C1q. *Journal of Experimental Medicine* 179:1809-1821.
- 1274 80. Dunkelberger JR, Song WC. 2010. Complement and its role in innate and  
1275 adaptive immune responses. *Cell Res* 20:34-50.
- 1276 81. Beatch M, Hobman TC. 2000. Rubella virus capsid associates with host cell  
1277 protein p32 and localizes to mitochondria. *J Virol* 74:5569–5576.

- 1278 82. Le Sage V, Cinti A, Valiente-Echeverría F, Mouland AJ. 2015. Proteomic  
1279 analysis of HIV-1 Gag interacting partners using proximity-dependent  
1280 biotinylation. *Virology Journal* 12.
- 1281 83. Liu Z, Kato A, Oyama M, Kozuka-Hata H, Arii J, Kawaguchi Y, Sandri-Goldin  
1282 RM. 2015. Role of host cell p32 in Herpes Simplex Virus 1 de-envelopment  
1283 during viral nuclear egress. *Journal of Virology* 89:8982-8998.
- 1284 84. Cohen S, Valm AM, Lippincott-Schwartz J. 2018. Interacting organelles. *Current*  
1285 *Opinion in Cell Biology* 53:84-91.
- 1286 85. Choi Y, Kwon Y-C, Kim S-I, Park J-M, Lee K-H, Ahn B-Y. 2008. A hantavirus  
1287 causing hemorrhagic fever with renal syndrome requires gC1qR/p32 for efficient  
1288 cell binding and infection. *Virology* 381:178-183.
- 1289 86. Pednekar L, Valentino A, Ji Y, Tumma N, Valentino C, Kadoor A, Hosszu KK,  
1290 Ramadass M, Kew RR, Kishore U, Peerschke EIB, Ghebrehiwet B. 2016.  
1291 Identification of the gC1qR sites for the HIV-1 viral envelope protein gp41 and  
1292 the HCV core protein: Implications in viral-specific pathogenesis and therapy.  
1293 *Molecular Immunology* 74:18-26.
- 1294 87. Song X, Yao Z, Yang J, Zhang Z, Deng Y, Li M, Ma C, Yang L, Gao X, Li W,  
1295 Liu J, Wei L. 2016. HCV core protein binds to gC1qR to induce A20 expression  
1296 and inhibit cytokine production through MAPKs and NF- $\kappa$ B signaling pathways.  
1297 *Oncotarget* 7:33796-33808.
- 1298 88. Xu L, Xiao N, Liu F, Ren H, Gu J. 2009. Inhibition of RIG-I and MDA5-  
1299 dependent antiviral response by gC1qR at mitochondria. *Proc Natl Acad Sci U S*  
1300 *A* 106:1530-1535.
- 1301 89. Claus C, Chey S, Heinrich S, Reins M, Richardt B, Pinkert S, Fechner H, Gaunitz  
1302 F, Schafer I, Seibel P, Liebert UG. 2011. Involvement of p32 and Microtubules in  
1303 Alteration of Mitochondrial Functions by Rubella Virus. *Journal of Virology*  
1304 85:3881-3892.
- 1305 90. de Graaf DC, Brunain M, Scharlaken B, Peiren N, Devreese B, Ebo DG, Stevens  
1306 WJ, Desjardins CA, Werren JH, Jacobs FJ. 2010. Two novel proteins expressed  
1307 by the venom glands of *Apis mellifera* and *Nasonia vitripennis* share an ancient  
1308 C1q-like domain. *Insect Molecular Biology* 19:1-10.
- 1309 91. Consortium TIAG. 2010. Genome sequence of the pea aphid *Acyrtosiphon*  
1310 *pisum*. *PLoS Biol* 8:e1000313.
- 1311 92. Pinheiro PV, Wilson JR, Xu Y, Zheng Y, Rebelo AR, Fattah-Hosseini S, Kruse  
1312 A, Dos Silva RS, Xu Y, Kramer M, Giovannoni J, Fei Z, Gray S, Heck M. 2019.  
1313 Plant viruses transmitted in two different modes produce differing effects on  
1314 small RNA-mediated processes in their aphid vector. *Phytobiomes Journal* 3:71-  
1315 81.
- 1316 93. Burrows ME, Caillaud MC, Smith DM, Benson EC, Gildow FE, Gray SM. 2006.  
1317 Genetic regulation of polerovirus and luteovirus transmission in the aphid  
1318 *Schizaphis graminum*. *Phytopathology* 96:828-837.
- 1319 94. Franco-Lara LF, McGeachy KD, Commandeur U, Martin RR, Mayo MA, Barker  
1320 H. 1999. Transformation of tobacco and potato with cDNA encoding the full-  
1321 length genome of potato leafroll virus: evidence for a novel virus distribution and  
1322 host effects on virus multiplication. *J Gen Virol* 80 ( Pt 11):2813-2822.

- 1323 95. DeBlasio SL, Rebelo AR, Parks K, Gray S, Cilia M. 2018. Disruption of  
1324 chloroplast function through downregulation of phytoene desaturase enhances the  
1325 systemic accumulation of an aphid-borne, phloem-restricted virus. *Mol Plant*  
1326 *Microbe Interact* doi:10.1094/MPMI-03-18-0057-R:doi: 10.1094/MPMI-1003-  
1327 1018-0057-R.
- 1328 96. DeBlasio S, Xu Y, Johnson R, Rebelo A, MacCoss M, Gray S, Heck M. 2018.  
1329 The interaction dynamics of two Potato Leafroll Virus movement proteins affects  
1330 their localization to the outer membranes of mitochondria and plastids. *Viruses*  
1331 10:585.
- 1332 97. Peter KA, Liang D, Palukaitis P, Gray SM. 2008. Small deletions in the potato  
1333 leafroll virus readthrough protein affect particle morphology, aphid transmission,  
1334 virus movement and accumulation. *J Gen Virol* 89:2037-2045.
- 1335 98. MacLean B, Tomazela DM, Shulman N, Chambers M, Finney GL, Frewen B,  
1336 Kern R, Tabb DL, Liebler DC, MacCoss MJ. 2010. Skyline: an open source  
1337 document editor for creating and analyzing targeted proteomics experiments.  
1338 *Bioinformatics* 26:966-968.
- 1339 99. Earley KW, Haag JR, Pontes O, Opper K, Juehne T, Song K, Pikaard CS. 2006.  
1340 Gateway-compatible vectors for plant functional genomics and proteomics. *Plant*  
1341 *J* 45:616-629.
- 1342  
1343  
1344  
1345  
1346  
1347  
1348  
1349  
1350  
1351  
1352  
1353  
1354  
1355  
1356  
1357  
1358  
1359  
1360  
1361  
1362  
1363  
1364  
1365  
1366  
1367  
1368

1369  
1370  
1371  
1372  
1373  
1374  
1375  
1376  
1377

## FIGURES

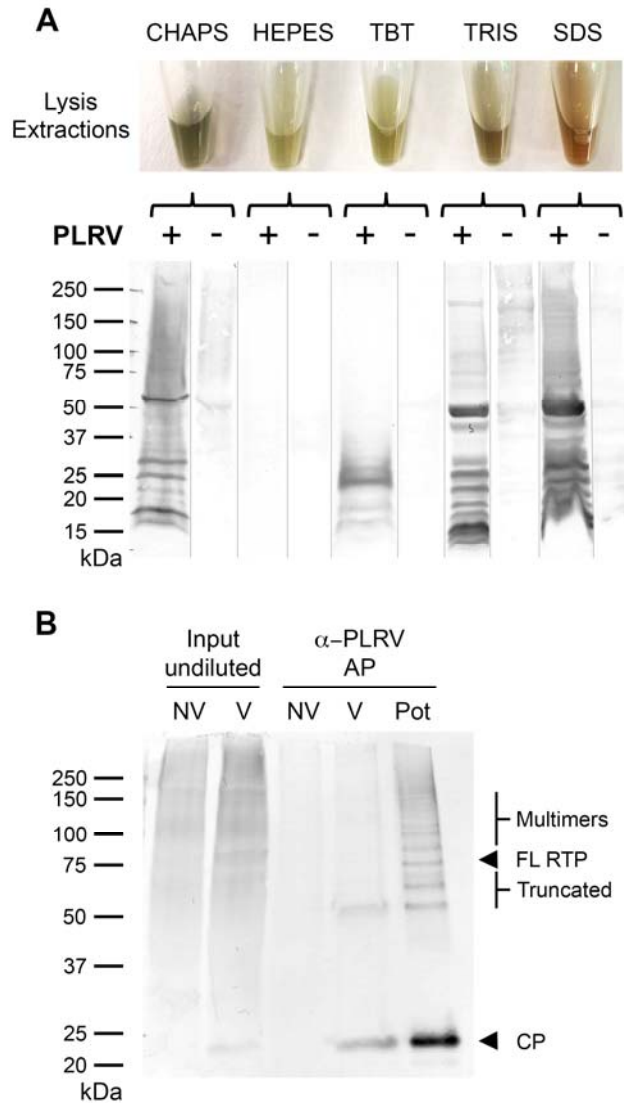

1378  
1379  
1380  
1381  
1382  
1383  
1384

**FIG 1** Comparison and validation of extraction conditions for isolating PLRV-vector protein complexes. (A) Four different affinity purification buffer compositions (CHAPS, HEPES, TBT and TRIS) were tested by far western analysis for their ability to extract PLRV-aphid protein complexes compared to total protein extraction using an SDS denaturing buffer (far right lane). The top panel shows variation in the color of the

1385 resulting protein homogenate from cryo-milled aphid tissue extracted in each buffer.  
1386 Bottom panel shows vector protein bands binding to WT PLRV as determined by one-  
1387 dimensional separation of extracts followed by incubation with purified WT PLRV (+)  
1388 and subsequent detection with an in-house PLRV antibody. Negative controls (-) were  
1389 made by omitting incubation with WT PLRV on a parallel western and these lanes  
1390 superimposed onto the image of the PLRV (+) blot (gray lines). (B) Western blot analysis  
1391 of  $\alpha$ -PLRV affinity purification experiments from *M. persicae* aphid protein complexes  
1392 extracted using the TRIS buffer composition show significant enrichment of the PLRV  
1393 coat protein (CP) and a truncated form (Truncated) of the structural readthrough protein  
1394 (RTP) in viruliferous (V) *M. persicae* aphids compared to the undiluted affinity  
1395 purification input fraction and a negative control affinity purification using non-  
1396 viruliferous insects. Enrichment of the PLRV structural proteins in an AP from  
1397 systemically infected potato tissue (Pot) is shown as a positive control. Molecular  
1398 weights corresponding to the full length form of the RTP (FL RTP) and RTP multimers  
1399 are also indicated.  
1400  
1401  
1402  
1403

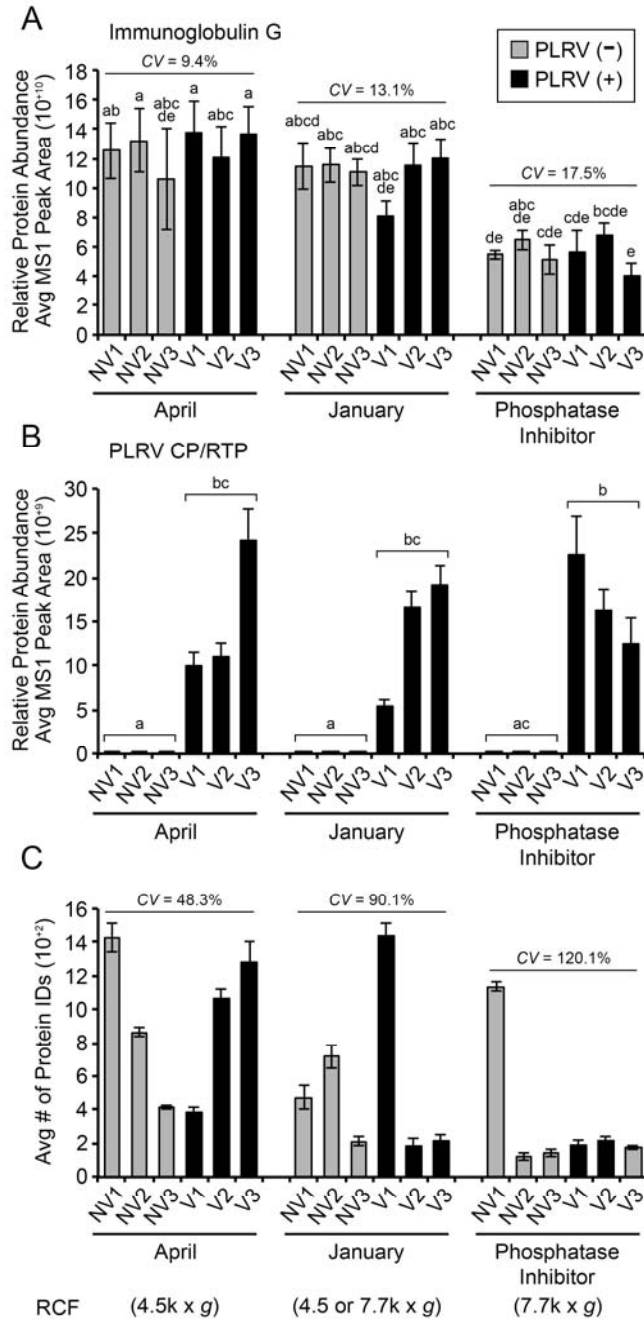

1404  
1405

1406 **FIG 2** Assessment of variability in  $\alpha$ -PLRV affinity purifications from aphids using  
1407 affinity purification mass spectrometry quality control metrics. (A-B) Bar graphs show  
1408 the average relative protein abundance of (A) Immunoglobulin G (IgG) and (B) the  
1409 PLRV structural proteins (CP/RTP) quantified from integration of MS1 (precursor ion)  
1410 peak areas (unit-less) for protein specific peptides detected in  $\alpha$ -PLRV APs from non-  
1411 viruliferous (NV, gray bars) and viruliferous (V, black bars) aphid pools ( $n=3$  analytical  
1412 replicates per biological replicate) across the three independent datasets (April, January  
1413 and Phosphatase Inhibitor added). The number of peptides used for quantification of  
1414 protein abundance are: IgG = 9 and CP/RTP = 7 (Table S2). (C) Bar graph shows the



1415 average number of total proteins identified in each biological replicate sample ( $n = 3$   
1416 analytical replicates) by MS. Centrifugal speed (RCF) of homogenate clarification step is  
1417 given. For each panel, error bars represent  $\pm$  one standard error. Lower case letters  
1418 represent significant differences ( $P < 0.05$ ) calculated by (A) ANOVA and (B) Kruskal-  
1419 Wallis with Tukey-HSD and Conover (Holm adjustment) post hoc tests, respectively.  
1420 Lines represent percent coefficient of variance (CV).  
1421

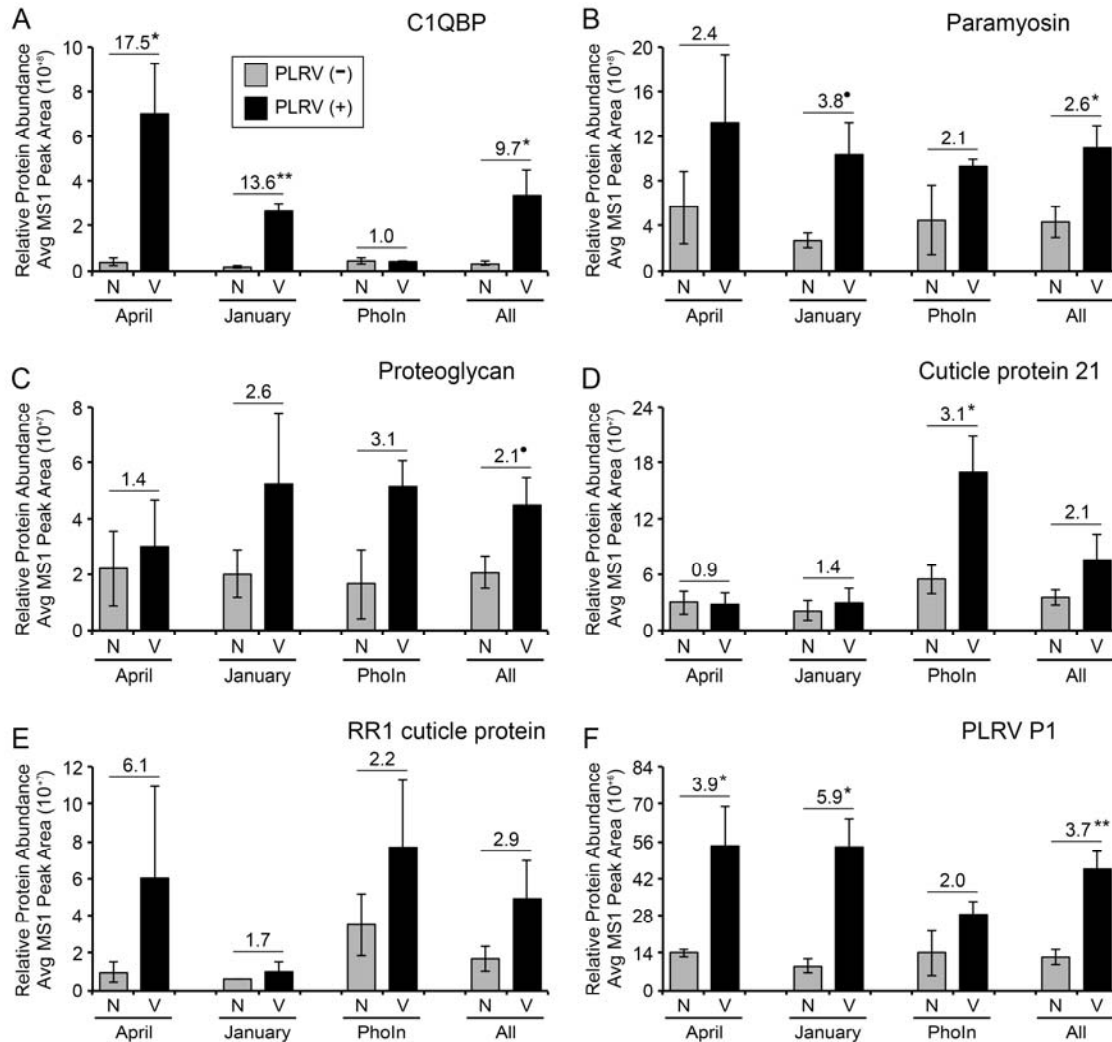

1422  
1423

1424 **FIG 3** Label-free quantification of vector and viral protein enrichment in  $\alpha$ -PLRV  
1425 affinity purifications from viruliferous *M. persicae* using MS1 peak integration. Bar  
1426 graphs show relative protein abundance measured by integration of MS1 (precursor ion)  
1427 peak areas (unit-less) of protein specific peptides corresponding to a selected group of  
1428 (A-E) vector and (F) viral proteins found to have significantly enriched total spectral  
1429 counts in  $\alpha$ -PLRV affinity purification biological replicates from viruliferous aphids  
1430 (Table 1 and 2). The number of peptides used for MS1 quantification are (A) C1QBP = 6,  
1431 (B) Paramyosin = 21, (C) Proteoglycan-4 like = 4, (D) Cuticle protein 21 = 6, (E) RR1  
1432 cuticle protein 5 = 3 and (F) the PLRV P1 polyprotein = 3. The MS1 integration data is  
1433 shown as an average of  $n = 3$  biological replicate  $\alpha$ -PLRV APs from non-viruliferous  
1434 aphids (NV, gray bars) and viruliferous aphids (V, black bars) compared within each of  
1435 the three independent datasets: April, January and phosphatase inhibitor added (PhoIn).  
1436 The average protein abundance for all three datasets combined (All,  $n = 9$  biological  
1437 replicates) is also shown. Error bars represent  $\pm$  one standard error. Lines above bars  
1438 indicate fold enrichment in  $\alpha$ -PLRV affinity purifications from viruliferous aphids  
1439 compared to affinity purifications from non-viruliferous aphids with statistical

1440 significance ( $\bullet = P < 0.06$ ,  $* = P < 0.05$ ,  $** = P < 0.01$ ) calculated by Student's *t*-test  
1441 (normal data) or Welch's T-test (non-normal data) within an AP dataset.  
1442

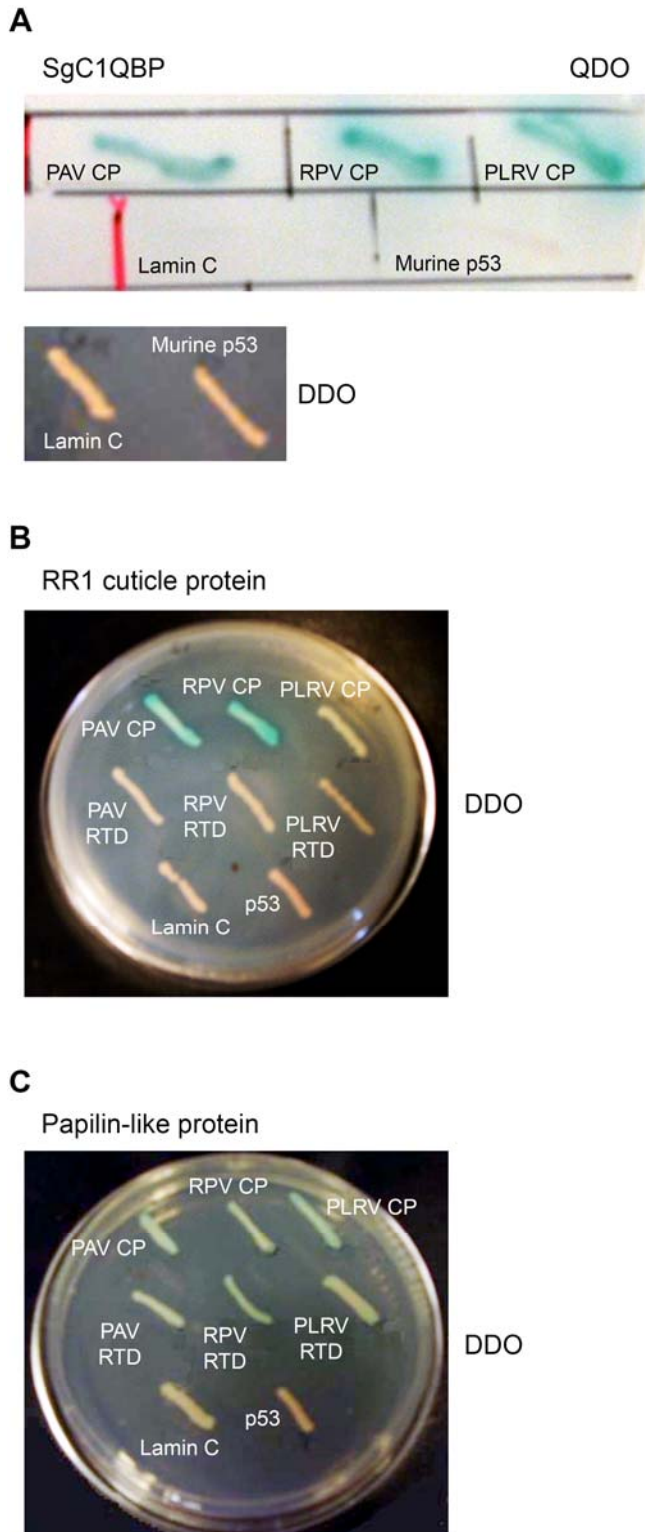

1443  
1444  
1445  
1446  
1447  
1448

**FIG 4** Identification of *Schizaphis graminum* proteins directly binding to luteovirid structural proteins using yeast-two-hybrid (Y2H) assay. Interactions between (A) C1QBP, (B) RR1-type cuticle protein and (C) papilin-like protein from *S.s graminum* (Sg) with the coat protein (CP) or readthrough domain (RTD) of the luteovirids BYDV-

1449 PAV (PAV), CYDV-RPV (RPV), and PLRV. Vector and viral proteins were co-  
1450 expressed as GAD-T7-Rec and DNA-BD fusions, respectively. Co-transformed cells  
1451 were grown on yeast quadruple-dropout (QDO) medium (SD/-Ade/-His/-Leu/-Trp)  
1452 and/or double-dropout (DDO, SD/-Leu/-Trp) supplemented with X- $\alpha$ -Gal. Co-  
1453 transformation of GAD-T7-Rec-vector protein constructs with lamin C or murine p53  
1454 fused to DNA-BD were used as negative controls.  
1455  
1456

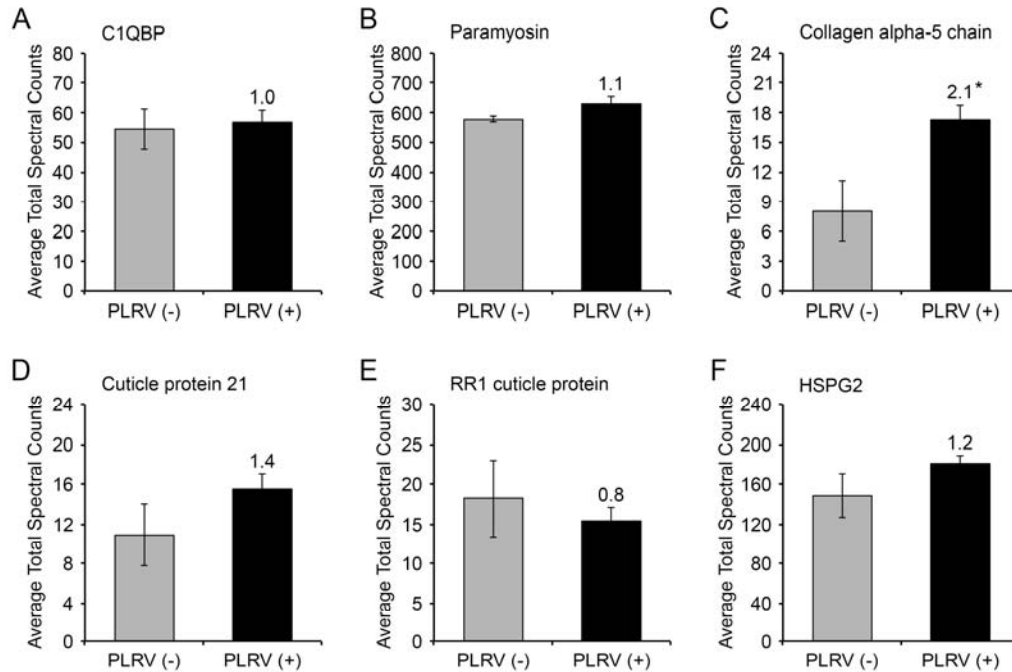

1457

1458

1459

1460

1461

1462

1463

1464

1465

1466

1467

1468

**FIG 5** PLRV interacting proteins in viruliferous compared to non-viruliferous aphids do not change expression in aphids upon virus acquisition. Graphed are the average total spectral counts (SPC) of (A) C1QBP, (B) Paramyosin, (C) Collagen alpha-5 chain, (D) Cuticle protein 21, (E) RR1 cuticle protein and (F) HSPG2 in viruliferous (PLRV +, black bars) or non-viruliferous (PLRV -, gray bars) *M. persicae* aphids ( $n = 3-4$  pools of aphids). Values above black bars indicate fold enrichment in viruliferous aphids compared to non-viruliferous controls and significantly different groups via Student's t-test (\* =  $P < 0.05$ ) and error bars represent  $\pm$  one standard error.

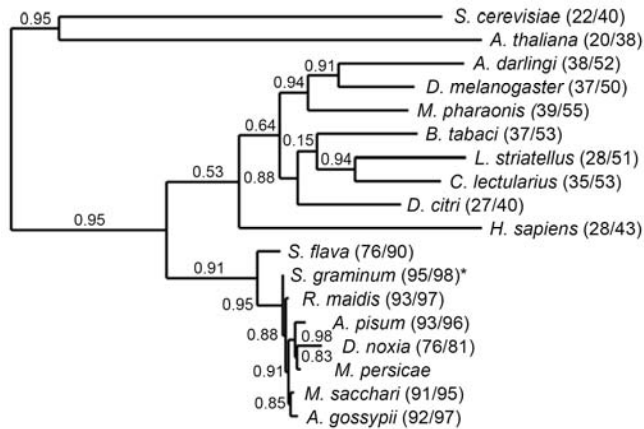

1469

1470

1471 **FIG 6** Phylogenetic analysis of C1QBP orthologous protein sequences using maximum  
1472 likelihood indicates C1QBP from insects is more closely related to C1QBP from humans  
1473 than yeast or plants. The analysis included 18 protein sequences representing aphids,  
1474 insects and other diverse model organisms. Branch points and bootstrap values were  
1475 obtained from 100 iterations using the PhyML 3.1/3.0 aLRT algorithm and TreeDyn for  
1476 tree drawing. Values in parentheses represent the percent identity/percent similarity in a  
1477 pairwise sequence comparison with the *M. persicae* C1QBP sequence using BLAST  
1478 Global Align. Accession numbers for all sequences used in this analysis are listed in  
1479 Materials and Methods.

1480

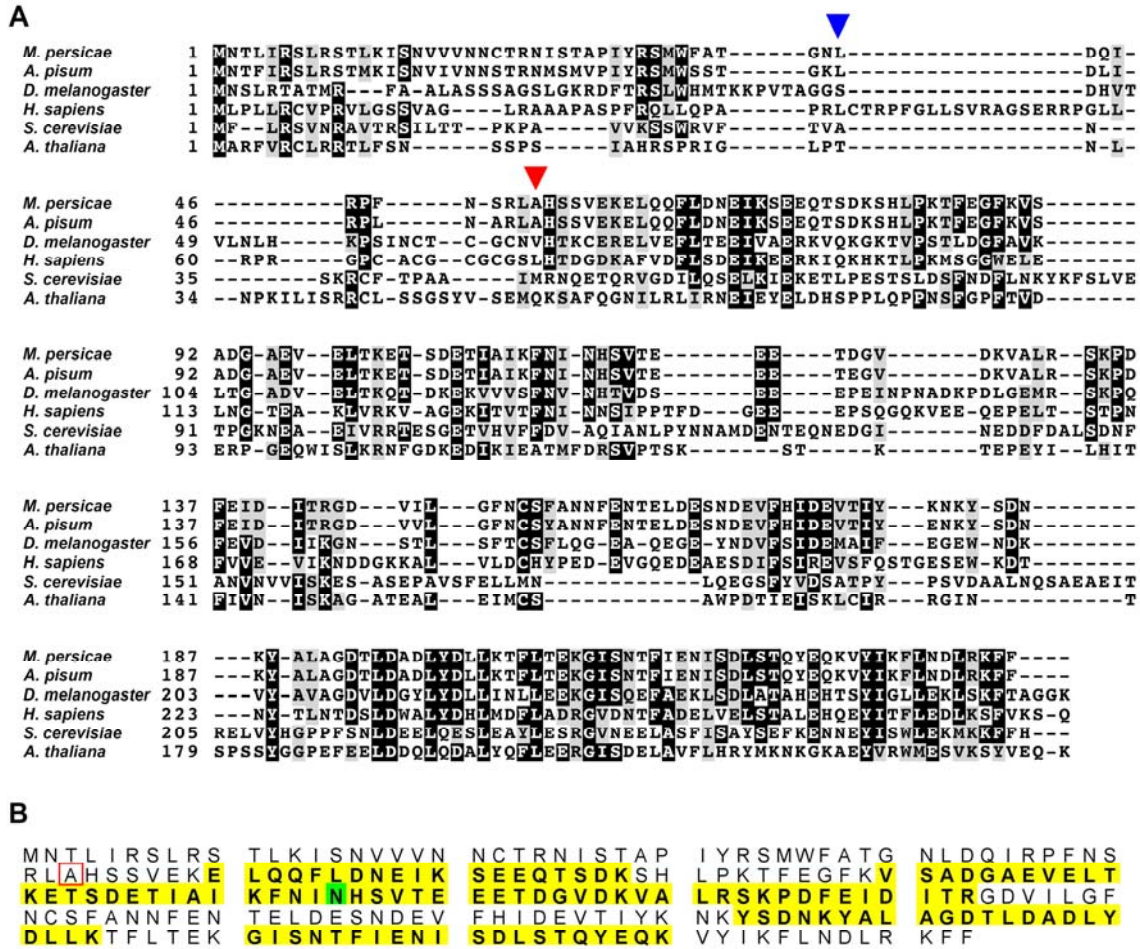

1481  
 1482  
 1483  
 1484  
 1485  
 1486  
 1487  
 1488  
 1489  
 1490  
 1491  
 1492  
 1493  
 1494  
 1495  
 1496  
 1497  
 1498  
 1499  
 1500

**FIG 7** Multiple sequence alignment of C1QBP proteins from diverse organisms shows conservation of an N-terminal truncation site and the C-terminal region of the protein. (A) Selected orthologous C1QBP protein sequences from aphids (*M. persicae* and *A. pisum*), fruit flies (*D. molenogaster*), humans (*H. sapiens*), yeast (*S. cerevisiae*) and plants (*A. thaliana*) were aligned using Clustal Omega Multiple Sequence alignment and visualized using BoxShade. Black boxes indicate identical residues whereas gray boxes highlight residues that are similar. The red arrowhead highlights the known site of N-terminal truncation of the human form of C1QBP. The blue arrowhead indicates the residue corresponding to the start of the truncated *S. graminum* C1QBP protein that was identified interacting with the luteovirid BYDV-RPV by yeast-two-hybrid screening. (B) Visual representation of the peptide coverage for the *M. persicae* C1QBP protein found to be significantly co-enriched with PLRV. Yellow blocks indicate the tryptic peptides detected by nanoflow LC-MS/MS after analysis in Scaffold. The green block highlights a deamidated asparagine residue. The alanine residue corresponding to the known site of N-terminal truncation in human C1QBP is highlighted by a red box.



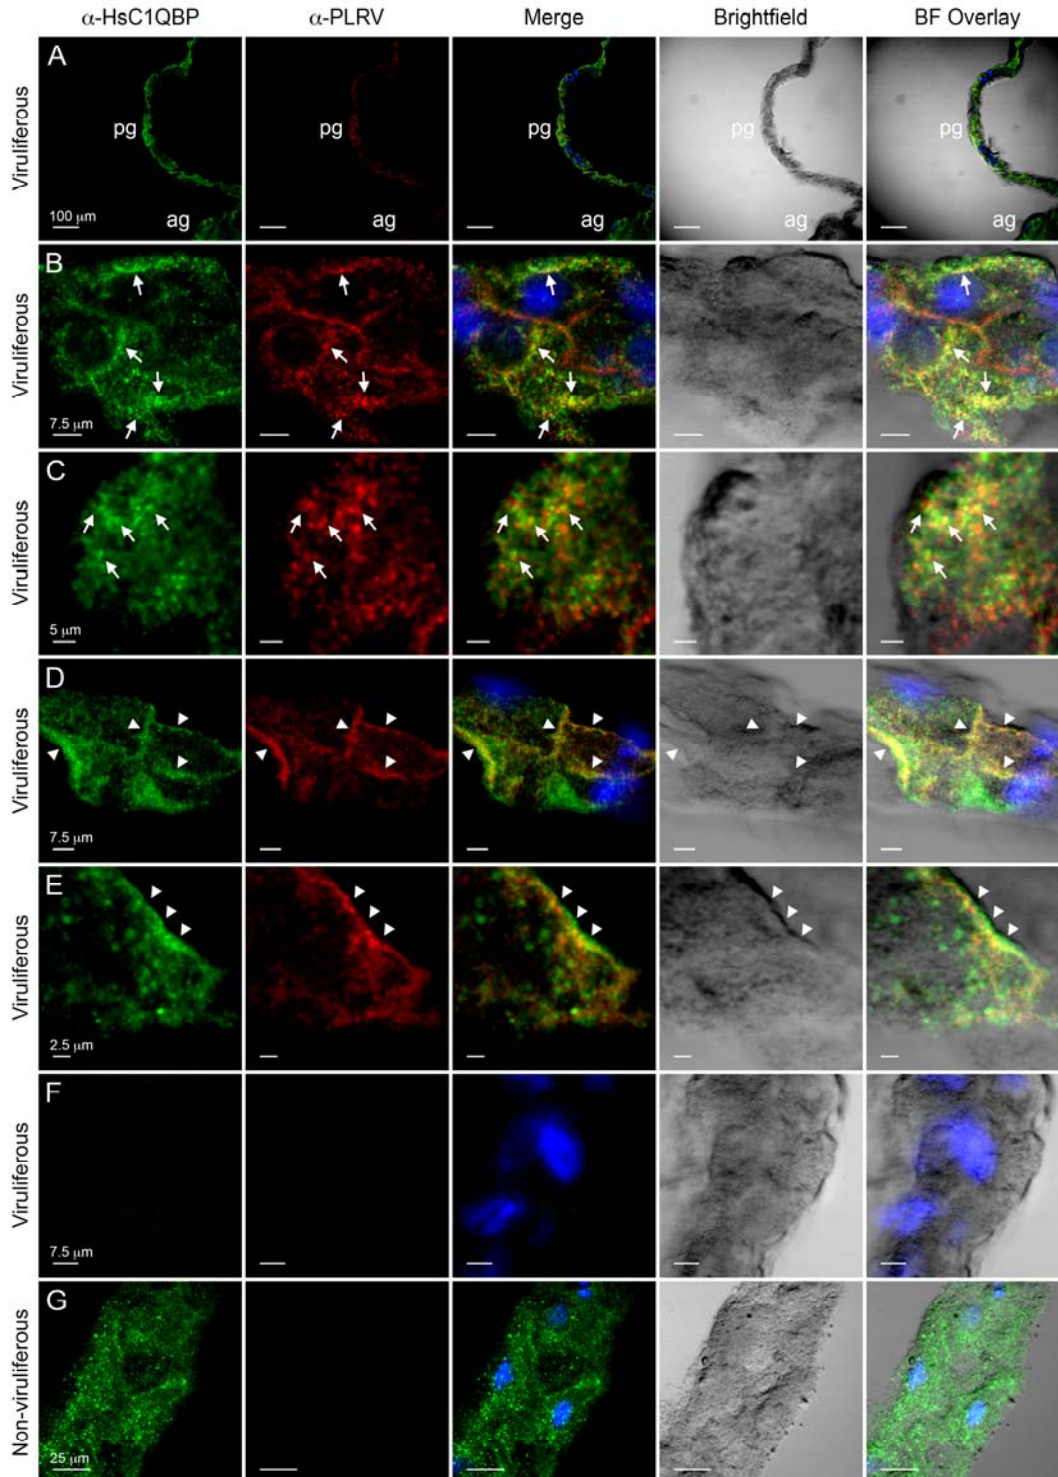

1501

1502

1503

1504

1505

1506

**FIG 8** Immunolocalization of C1QBP and PLRV in *M. persicae* gut epithelial cells. Panels show representative single-plane confocal micrographs of guts dissected from viruliferous or non-viruliferous aphids that were immunolabeled with both  $\alpha$ -HsC1QBP (Cy2, green) and  $\alpha$ -PLRV (Cy3, red). The overlap of the fluorescent signals from  $\alpha$ -

1507 HsC1QBP and  $\alpha$ -PLRV is shown in the column labeled Merge with co-localization  
1508 appearing in yellow. Nuclei stained with DAPI appear blue. Brightfield images and the  
1509 Brightfield (BF) overlay are also shown. (A) 10x magnification of the anterior midgut  
1510 (ag) and posterior midgut (pg) of a single viruliferous gut shows localization of  $\alpha$ -  
1511 HsC1QBP throughout the entire midgut while the fluorescence indicating  $\alpha$ -PLRV is  
1512 strongly detected in the posterior midgut. (B-E) Within individual posterior midgut cells  
1513 from different guts, points of co-localization of  $\alpha$ -HsC1QBP and  $\alpha$ -PLRV could be  
1514 observed as diffuse puncta (B-C) always within the cytoplasm (white arrows) or (D-E)  
1515 sometimes at the cell periphery (white arrowheads). (F) Incubation of a viruliferous gut  
1516 with only Cy2-conjugated and Cy3-conjugated secondary antibodies and (G) non-  
1517 viruliferous gut with both  $\alpha$ -HsC1QBP and  $\alpha$ -PLRV represent our negative controls. The  
1518 Cy2 signal in panels (C) and (E) was imaged using a hybrid (HyD) detector and a PMT  
1519 detector in all other images. Scale bars equal the length indicated.  
1520  
1521

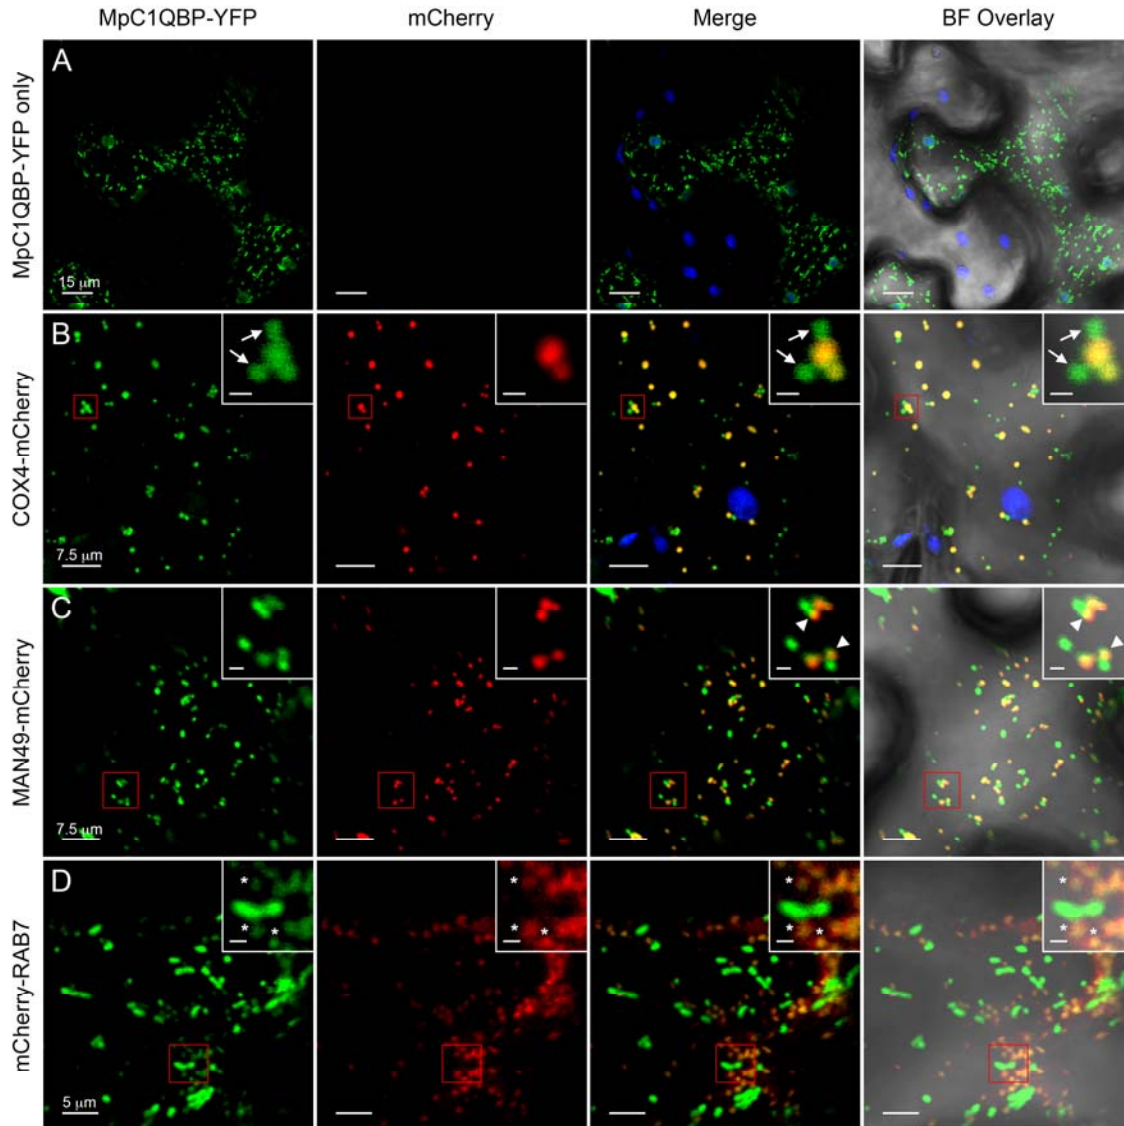

1522  
1523

1524 **FIG 9** Heterologous expression of *M. persicae* C1QBP in plants shows localization to  
1525 multiple, motile organelles similar to localization in human cells. Panels show  
1526 representative single-plane confocal micrographs of live *N. benthamiana* epidermal cells  
1527 constitutively expressing (A) MpC1QBP-YFP alone or with the organelle markers (B)  
1528 COX4-mCherry (mitochondria), (C) MAN49-mCherry (*cis*-Golgi) or (D) mCherry-  
1529 RAB7 (transitory late endosomes). The fluorescence from MpC1QBP-YFP and mCherry  
1530 are false colored green and red, respectively. The overlap of the fluorescent signals from  
1531 YFP and mCherry is shown in the column labeled Merge with co-localization of the  
1532 indicated fusion proteins appearing in yellow. The brightfield overlay (BF Overlay) is  
1533 also shown. Chloroplast autofluorescence is falsely colored blue. The inset in each panel  
1534 is a magnified view of the area highlighted by the red box. White arrows indicate  
1535 globular, MpC1QBP-YFP fluorescence that was observed fusing with mitochondrial-  
1536 localized MpC1QBP-YFP. White arrowheads mark the sites of partial co-localization of  
1537 MpC1QBP-YFP with the MAN49-mCherry labeled *cis*-Golgi. White asterisks highlight

1538 mark some sites of MpC1QBP-YFP and mCherry-RAB7 co-localization. Scale bars  
1539 within the main panels show the length indicated while inset scale bars equal 1  $\mu$ m.  
1540  
1541

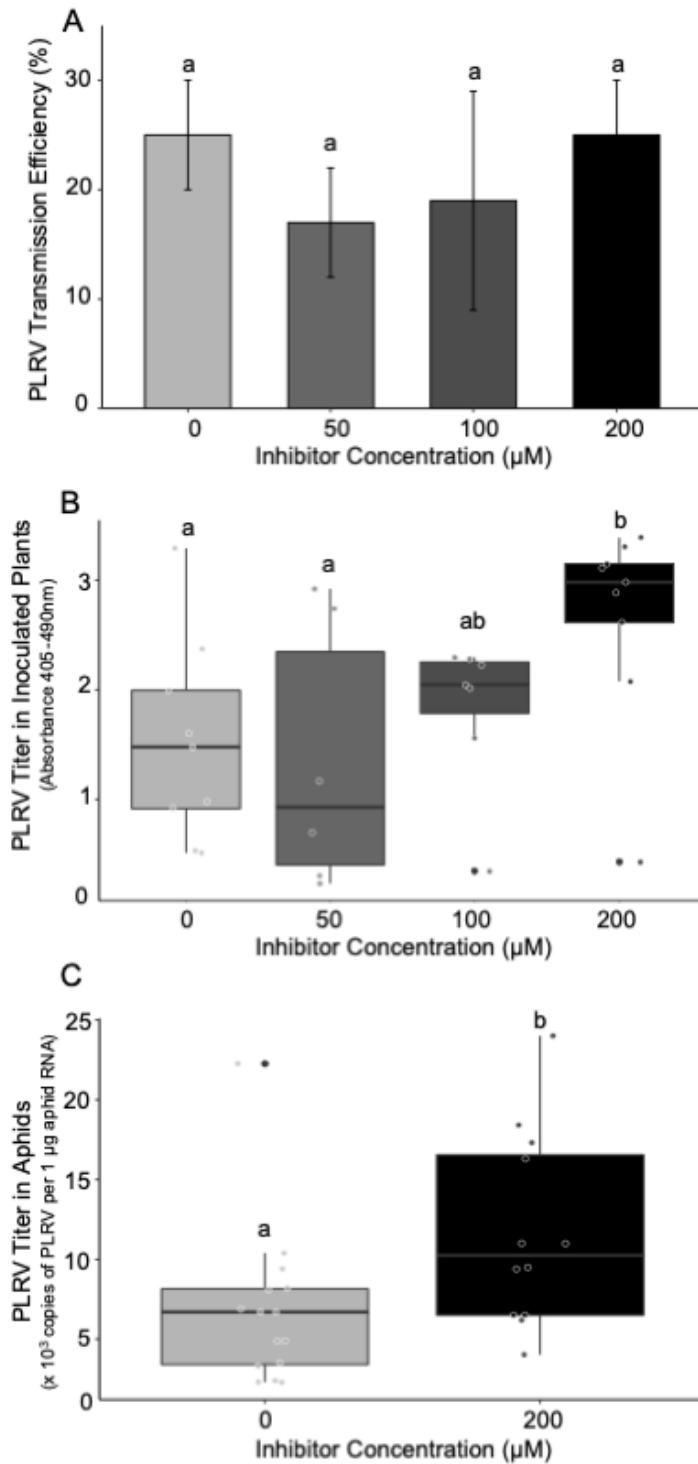

1542  
1543  
1544  
1545  
1546  
1547  
1548

**FIG 10** Transmission efficiency and virus titer in plants and aphids after aphid exposure to the M36 chemical inhibitor of C1QBP. *M. persicae* aphids were exposed to 0, 50, 100 and 200 µM of the M36 chemical inhibitor for 48 hours before transmitting PLRV from infected HNS leaves to potato seedlings. The number of infected potato plants and PLRV

1549 titer within those plants was assessed via DAS-ELISA after four weeks. (A) Bar graph of  
1550 transmission efficiency of aphids exposed to the inhibitor, expressed as percent plants  
1551 infected out of total plants inoculated ( $n = 51$ ). Different letters indicate significantly  
1552 different treatments ( $P < 0.05$ ) by logistic regression analysis. Error bars represent  $\pm$  one  
1553 standard error. (B) Box plot of PLRV titer in infected potato plants ( $n = 5-9$ ) inoculated  
1554 by aphids exposed to various concentrations of inhibitor. Letters indicate significantly  
1555 different treatments ( $P < 0.05$ ) by a linear mixed effects ANOVA. (C) After 48 hours of  
1556 aphid exposure to 0 or 200  $\mu\text{M}$  of inhibitor and a 24-hour AAP on PLRV-infected HNS  
1557 leaves, aphids were moved to sucrose diet for 3 days gut clearing and the copies of PLRV  
1558 were quantified in each individual aphid ( $n = 12-15$ ) by digital droplet PCR. Letters  
1559 represent significantly different treatments by a one-tailed, unpaired Student's  $t$ -test. B-C.  
1560 Dots represent titer values colored by treatment. The thick black line indicates the  
1561 median, with the box spanning the first and third quartiles. Lines reach out to the  
1562 minimum and maximum values. Outliers are indicated with a black dot.

1563  
1564  
1565  
1566  
1567

## TABLES

**Table 1. Lysis buffer compositions tested for extraction of PLRV-interacting vector proteins**

| Buffer name <sup>a</sup> | Buffer components <sup>b</sup>                                                                                                    |
|--------------------------|-----------------------------------------------------------------------------------------------------------------------------------|
| CHAPS                    | 1X phosphate buffered saline (pH 7.4), 40 mM CHAPS, 10 mM CaCl <sub>2</sub>                                                       |
| HEPES                    | 50 mM HEPES-KOH (pH 7.4), 110 mM KOAc, 2 mM MgCl <sub>2</sub> , 0.4% TritonX-100                                                  |
| TBT                      | 50 mM HEPES-KOH (pH 7.4), 200 mM Tris (pH7.5), 110 mM KOAc, 350 mM NaCl, 2 mM MgCl <sub>2</sub> , 0.4% TritonX-100, 0.1% Tween-20 |
| TRIS                     | 50 mM Tris ( pH 7.5), 150 mM NaCl, 0.4% TritonX-100                                                                               |
| SDS                      | 50 mM Tris (pH 6.8), 2.5% Sodium dodecyl sulfate, 10% glycerol                                                                    |

1568

<sup>a</sup>Names given to protein extraction buffers tested in Fig. 1.

<sup>b</sup>All buffers were supplemented with 0.5 mM phenylmethylsulfonyl and a 1:100 dilution of Halt™ EDTA-free protease inhibitor cocktail. Abbreviations for chemicals are described in materials and methods.

1569  
1570  
1571  
1572  
1573  
1574  
1575  
1576  
1577

**Table 2. Viral and vector proteins exhibiting high probability of interaction with PLRV in APs from viruliferous aphids using spectral counting**

| Protein Annotation <sup>a</sup> | Enrichment Category <sup>b</sup> | ANOVA p-value <sup>c</sup> | April Dataset   |           |                                         | January Dataset |           |                                         | Phosphatase Inhibitor |           |                                         |
|---------------------------------|----------------------------------|----------------------------|-----------------|-----------|-----------------------------------------|-----------------|-----------|-----------------------------------------|-----------------------|-----------|-----------------------------------------|
|                                 |                                  |                            | FE <sup>d</sup> | T-Test    | SAINT <sup>f</sup> p-value <sup>e</sup> | FE <sup>d</sup> | T-Test    | SAINT <sup>f</sup> p-value <sup>e</sup> | FE <sup>d</sup>       | T-Test    | SAINT <sup>f</sup> p-value <sup>e</sup> |
| CIQBP                           | April, January                   | < 0.00010***               | 19.7            | 0.0007*** | 1**                                     | +/-             | 0.017**   | 1**                                     | 0.0                   | 0.37      | 0                                       |
| paramyosin                      | January                          | 0.016*                     | 1.8             | 0.18      | 0                                       | 2.1             | 0.0082*** | 0                                       | 2.2                   | 0.081     | 0                                       |
| PLRV P1 polyprotein             | January                          | < 0.00010***               | nd              | nd        | nd                                      | +/-             | 0.009***  | 1***                                    | nd                    | nd        | nd                                      |
| ribonucleoprotein G             | January                          | 0.0028***                  | 1.3             | 0.8       | 0.13                                    | 6.0             | 0.0075*** | 0.85***                                 | nd                    | nd        | nd                                      |
| proteoglycan 4-like             | Phosph_In                        | 0.056                      | 1.7             | 0.64      | 0.21                                    | 1.3             | 0.8       | 0.1                                     | +/-                   | 0.013*    | 1**                                     |
| cuticle protein 21-like         | Phosph_In                        | 0.00027***                 | nd              | nd        | nd                                      | 0.4             | 0.62      | 0                                       | 7.3                   | 0.028*    | 0.95***                                 |
| proline-rich protein EPR1       | Phosph_In                        | 0.38                       | 2.2             | 0.58      | 0.3                                     | 0.0             | 0.12      | 0                                       | +/-                   | 0.018*    | 1**                                     |
| collagen alpha-5(IV)            | Phosph_In                        | 0.037*                     | nd              | nd        | nd                                      | +/-             | 0.37      | 0.33                                    | 3.8                   | 0.035*    | 0.67*                                   |
| cuticle protein 7-like          | Phosph_In                        | 0.49                       | 1.2             | 0.64      | 0                                       | 1.1             | 0.93      | 0                                       | 2.4                   | 0.014*    | 0                                       |
| cuticle protein 7-like          | Phosph_In                        | 0.5                        | 1.2             | 0.74      | 0                                       | 0.8             | 0.7       | 0                                       | 2.0                   | 0.038*    | 0                                       |
| cuticle protein 19-like         | Phosph_In                        | 0.43                       | 1.3             | 0.64      | 0                                       | 0.8             | 0.61      | 0                                       | 2.2                   | 0.0044*** | 0                                       |
| flexible cuticle protein        | Phosph_In                        | 0.0036***                  | 3.2             | 0.14      | 0.38                                    | 1.0             | 0.95      | 0                                       | 2.1                   | 0.0054*** | 0                                       |

1578  
1579  
1580  
1581  
1582  
1583  
1584  
1585  
1586  
1587  
1588  
1589  
1590  
1591  
1592  
1593

1594  
1595  
1596  
1597  
1598  
1599  
1600  
1601  
1602  
1603  
1604  
1605  
1606  
1607  
1608  
1609  
1610  
1611  
1612  
1613  
1614  
1615  
1616  
1617  
1618  
1619  
1620  
1621  
1622  
1623  
1624  
1625  
1626  
1627  
1628  
1629  
1630  
1631  
1632

**Table 2. Viral and vector proteins exhibiting high probability of interaction with PLRV in APs from viruliferous aphids using spectral counting**

<sup>a</sup>Functional annotation of prey protein sequences obtained from NCBI protein BLAST.

<sup>b</sup>The dataset(s) the indicated protein was found to be significantly enriched in APs from viruliferous aphids compared to their respective non-viruliferous negative controls.

<sup>c</sup>p-value from a one-way analysis of variance by ranks calculated in Scaffold Q+ comparing the mean total spectral counts detected in PLRV APs from non-viruliferous and viruliferous APs (n=3) across the three independent datasets. \*\*p-value ≤ 0.01, \*p-value ≤ 0.05.

<sup>d</sup>Fold enrichment calculation based on the ratio of the average total spectral counts detected in APs from viruliferous aphids to non-viruliferous negative controls within the indicated dataset. (+/- indicates presences/absence; nd = not detected).

<sup>e</sup>T-test p-value calculated in Scaffold Q+ comparing the average total spectral counts detected in APs from viruliferous aphids to non-viruliferous negative controls within a dataset. \*\*p-value ≤ 0.01, \*p-value ≤ 0.05.

<sup>f</sup>Significance Analysis of INTeractome (SAINT) probability score indicating interaction confidence of prey protein in APs from viruliferous aphids compared to negative controls within a dataset. \*\*High confidence interaction score (≥0.8), \*medium confidence interaction score (0.5-0.79).



1633  
1634  
1635  
1636  
1637

**Table 3. Vector proteins exhibiting medium confidence interaction scores with PLRV using spectral counting**

| Protein Annotation <sup>a</sup>         | Enrichment Category <sup>b</sup> | April           |                    | January         |                    | Phosphatase Inhibitor |                    |
|-----------------------------------------|----------------------------------|-----------------|--------------------|-----------------|--------------------|-----------------------|--------------------|
|                                         |                                  | FE <sup>c</sup> | SAINT <sup>d</sup> | FE <sup>c</sup> | SAINT <sup>d</sup> | FE <sup>c</sup>       | SAINT <sup>d</sup> |
| cuticle protein 7-like                  | April                            | 6.5             | 0.62*              | 0.4             | 0                  | 2.2                   | 0.4                |
| possible chitinase                      | April                            | +/-             | 0.63*              | 0.0             | 0                  | 2.1                   | 0.32               |
| putative inner membrane peptidase       | April                            | +/-             | 0.65*              | nd              | nd                 | nd                    | nd                 |
| splicing factor U2AF 50 kDa subunit     | April                            | +/-             | 0.65*              | nd              | nd                 | nd                    | nd                 |
| endothelin-converting enzyme            | April                            | +/-             | 0.65*              | +/-             | 0.33               | 0.0                   | 0                  |
| MARK2-like isoform X1                   | April                            | +/-             | 0.65*              | nd              | nd                 | 0.0                   | 0                  |
| coiled-coil domain-containing protein   | April                            | +/-             | 0.65*              | nd              | nd                 | nd                    | nd                 |
| RNA-binding protein cabeza-like         | April                            | 6.0             | 0.61*              | 4.0             | 0.33               | 0.0                   | 0                  |
| cuticle protein 16.5                    | January                          | 0.9             | 0.02               | 3.2             | 0.64*              | 2.4                   | 0.04               |
| DNA-directed RNA polymerase II          | January                          | 1.4             | 0.05               | +/-             | 0.67*              | 1.7                   | 0                  |
| papilin isoform X1                      | January                          | 1.0             | 0.05               | +/-             | 0.67*              | 0.0                   | 0                  |
| 60S acidic ribosomal protein            | January                          | 1.2             | 0                  | +/-             | 0.67*              | 0.0                   | 0                  |
| U4/U6.U5 tri-snRNP-associated protein   | January                          | nd              | nd                 | +/-             | 0.66*              | 1.5                   | 0.22               |
| small nuclear ribonucleoprotein D2-like | January                          | 1.1             | 0.02               | +/-             | 0.66*              | nd                    | nd                 |
| uncharacterized protein LOC111032353    | January                          | nd              | nd                 | +/-             | 0.65*              | 2.7                   | 0.31               |
| prostaglandin reductase 1-like          | January                          | 0.8             | 0                  | 2.6             | 0.60*              | 1.3                   | 0                  |
| RR1 cuticle protein 5                   | Phosph_In                        | 4.2             | 0.34               | nd              | nd                 | 15.5                  | 0.66*              |
| HSPG2                                   | Phosph_In                        | 0.0             | 0                  | 2.4             | 0.5                | 5.0                   | 0.62*              |
| proline-rich protein 36-like            | Phosph_In                        | 1.9             | 0.3                | 0.0             | 0                  | 6.8                   | 0.73*              |
| uncharacterized protein LOC111041433    | Phosph_In                        | nd              | nd                 | +/-             | 0.33               | +/-                   | 0.67*              |
| tubulointerstitial nephritis antigen    | Phosph_In                        | nd              | nd                 | 1.1             | 0.14               | +/-                   | 0.65*              |
| proline-rich protein EPR1               | Phosph_In                        | nd              | nd                 | 1.0             | 0.04               | +/-                   | 0.65*              |
| nuclear transcription factor Y subunit  | Phosph_In                        | 1.0             | 0.15               | +/-             | 0.33               | +/-                   | 0.65*              |

<sup>2</sup>

1638  
1639  
1640  
1641  
1642  
1643  
1644  
1645  
1646  
1647  
1648  
1649  
1650  
1651  
1652  
1653  
1654

1655  
1656  
1657  
1658  
1659  
1660  
1661  
1662  
1663  
1664  
1665  
1666  
1667  
1668  
1669  
1670  
1671  
1672  
1673  
1674  
1675  
1676  
1677  
1678  
1679  
1680  
1681  
1682  
1683  
1684  
1685  
1686  
1687  
1688  
1689  
1690  
1691  
1692  
1693  
1694  
1695  
1696  
1697  
1698  
1699  
1700

**Table 3. Vector proteins exhibiting medium confidence interaction scores with PLRV using spectral counting**

<sup>a</sup>Functional annotation of prey protein sequences obtained from NCBI protein BLAST.

<sup>b</sup>The dataset(s) the indicated protein was found to be significantly enriched in APs from viruliferous aphids compared to their respective non-viruliferous negative controls.

<sup>c</sup>Fold enrichment calculation based on the ratio of the average total spectral counts detected in APs from viruliferous aphids to non-viruliferous negative controls (n=3) within the indicated dataset. (+/- indicates presences/absence; nd = not detected).

<sup>d</sup>Significance Analysis of INTeractome (SAINT) probability score indicating interaction confidence of prey protein in APs from viruliferous aphids compared to negative controls within a dataset. \*Medium confidence interaction score (0.5-0.79).

**SUPPLEMENTARY DATA FOOTNOTES**

**Table S1: Viral and vector proteins found to be  $\geq 2$ -fold enriched in PLRV affinity purifications from viruliferous aphids in one or more independent AP-MS experiments**

<sup>a</sup>Prey proteins (or clusters) are grouped based on the number and significance of AP-MS dataset(s) they were found to be enriched  $\geq 2$ -fold or present/absent (+/-) in APs from viruliferous aphids compared to respective negative controls.

<sup>b</sup>Column indicates the dataset(s) prey proteins (or clusters) were found to be significantly enriched in APs from viruliferous aphids compared to their respective non-viruliferous negative controls.

<sup>c</sup>Protein accession corresponding to the viral and *Myzus persicae* protein sequences within our MS search database that was based on version 1.0 of the *M. persicae* (clone G006) genome assembly obtained from BIPAA AphidBase and viral sequences from NCBI. Bracketed integers denote the identification of a protein cluster and the number of proteins belonging to that cluster. Integers in parentheses indicate the number of additional proteins that share the same exact peptides identified by MS.

<sup>d</sup>Functional annotation of prey protein sequences obtained from NCBI protein BLAST.

1701 <sup>e</sup>Protein identifier for corresponding reference sequence in NCBI.  
1702 <sup>f</sup>Protein molecular weight based on amino acid sequence.  
1703 <sup>g</sup>TRUE denotes a protein cluster or protein that shares some but not all peptide sequences  
1704 with other proteins identified.  
1705 <sup>h</sup>Highlights the AP category the indicated prey protein (or cluster) was determined to be  
1706 significantly enriched (p-value < 0.05) by Student T-test in Scaffold Q+ using total  
1707 spectral counts.  
1708 <sup>i</sup>Highlights the AP category the indicated prey protein (or cluster) was determined to be  
1709 significantly enriched (p-value < 0.05) by ANOVA in Scaffold Q+ using total spectral  
1710 counts.  
1711 <sup>k</sup>Quantitative MS data representing the set of APs performed and analyzed in April 2015.  
1712 Biological replicates (n=3) corresponding to PLRV APs from non-viruliferous (N) and  
1713 viruliferous (V) *M. persicae* are denoted as AMPH and AMPW, respectively, in this  
1714 table.  
1715 <sup>m</sup>Quantitative MS data representing the set of APs performed and analyzed in January  
1716 2016 where phosphatase inhibitor cocktail was added to the AP lysis buffer. Biological  
1717 replicates (n=3) corresponding to PLRV APs from non-viruliferous (N) and viruliferous  
1718 (V) *M. persicae* are denoted as PhoIn\_H and PhoIn\_W, respectively, in this table.  
1719 <sup>p-q</sup>Average value of total spectral counts for PLRV APs from non-viruliferous and  
1720 viruliferous *M. persicae* within the indicated dataset.  
1721 <sup>r</sup>Fold enrichment calculation based on the ratio of the average total spectral counts  
1722 detected in APs from viruliferous aphids to non-viruliferous negative controls within the  
1723 indicated dataset. (+/- denotes presences/absence; nd = not detected).  
1724 <sup>s</sup>T-test p-value calculated in Scaffold Q+ comparing the average total spectral counts  
1725 detected in APs from viruliferous aphids to non-viruliferous negative controls within a  
1726 dataset.  
1727 <sup>t</sup>Significance Analysis of INTeractome (SAINT) probability score indicating interaction  
1728 confidence of each prey protein in APs from viruliferous aphids compared to non-  
1729 viruliferous negative controls within a dataset. High confidence interaction scores are  
1730 <sup>3</sup>0.8, medium confidence interaction score are between 0.5 and 0.79, low or no  
1731 confidence scores are ≤ 0.5. Scores in red indicate the SAINT probability of interaction  
1732 when the total spectral counts detected in each of the indicated APs from viruliferous  
1733 aphids were compared to all non-viruliferous negative controls, including ones from the  
1734 other two datasets.

1735

### 1736 **Table S2. Peptides measured by MS1 peak integration**

1737 <sup>a</sup>NCBI reference number corresponding to protein sequences with peptide spectral  
1738 matches in our AP samples.  
1739 <sup>b</sup>Protein symbol of viral and vector proteins whose levels were analyzed by MS1 peak  
1740 integration, including immunoglobulin G (IgG) that was coupled to the magnetic beads.  
1741 <sup>c</sup>Amino acid sequence of peptide ions deduced from MS2 fragmentation that were used to  
1742 quantify protein levels in AP samples by MS1 quantification. The residue position of the  
1743 start and end of each peptide within the corresponding sequence in our protein database is  
1744 shown in brackets. The amino acid residues before and after trypsin cleavage are given as  
1745 a reference. Missed 1 indicates a missed cleavage site. Modified residues are underlined  
1746 and bold faced.

1747 <sup>e</sup> Average peptide retention time given in minutes.

1748 <sup>f</sup> Charge state of peptide precursor ion analyzed.

1749 <sup>g</sup> Sum of the integrated MS1 peak area for all precursor isotope ions ([M]+[M+1]+[M+2])  
1750 minus background measured in each analytical replicate of an affinity purification (AP)  
1751 sample using Skyline MS1 full-scan filtering and manual peak boundary refinement. The  
1752 data is segregated into the three independent AP-MS experiments: the April, January and  
1753 Phosphatase Inhibitor datasets.

1754 <sup>h</sup> Sample names for non-viruliferous (NV) and viruliferous (V) AP analytical replicates  
1755 written as AP\_biological replicate number\_analytical replicate number. The  
1756 corresponding raw MS file available via ProteomeXchange with identifier PXD022167 is  
1757 given in brackets.

1758

1759 **Table S3. Logistic Regression Analysis of PLRV Transmission by *M. persicae***  
1760 **Aphids after Exposure to the C1QBP Chemical Inhibitor**

1761 <sup>a</sup> Model output is the categorical variable “InfectionState” with levels 0 = uninfected and  
1762 1 = PLRV-infected indicating whether the inoculated plant became systemically infected.

1763 <sup>b</sup> “Treatment” is a quantitative variable indicating the concentration of the chemical  
1764 inhibitor delivered to the aphids.

1765 <sup>c</sup> “Exp” is a categorical variable representing the different trials of the experiment.

1766 Abbreviations: *SE*, standard error; *df*, degrees of freedom; *H<sub>0</sub>*, null hypothesis

1767
